# Supplementary material for: Monoalkylation of aniline with trichloroacetimidate catalyzed by (±)-camphorsulfonic acid through an SN1 reaction based on dual hydrogen-bonding activation modes
Source: Royal Society of Chemistry journal article supplement (doi:10.1039/d0nj00239a), 2020-01-01
Supplement: d0nj00239a1.pdf [file d0nj00239a1.pdf]

## Supplementary Materials

### **Monoalkylation of Aniline with Trichloroacetimidate Catalyzed by (±)- Camphorsulfonic acid through the S<sub>N</sub>1 reaction via dual hydrogen- bonding activation modes**

*Ka Lu,<sup>a</sup> Yang Dai,<sup>a</sup> Chao-Xian Yan,<sup>a</sup> Fang-Ling Yang,<sup>a</sup> Xing Yang,<sup>a</sup> Pan-Pan Zhou,<sup>\*a</sup>*

*Zhaoyong Yang<sup>\*b</sup>*

*<sup>a</sup>State Key Laboratory of Applied Organic Chemistry, College of Chemistry and Chemical Engineering,  
Key Laboratory of Nonferrous Metal Chemistry and Resources Utilization of Gansu Province, Lanzhou  
University, 222 South Tianshui Road, 730000, Lanzhou, P. R. China. Fax: +86-931-8912582; Tel: +86  
931 8912862; E-mail: zhoupp@lzu.edu.cn*

*<sup>b</sup>Key Laboratory of Biotechnology of Antibiotics, Ministry of Health, Institute of Medicinal  
Biotechnology, Chinese Academy of Medical Sciences (CAMS) and Peking Union Medical  
College(PUMC), Beijing 100050, China, \*E-mail: zhaoyongy@163.com*

## 1. QTAIM Analyses

QTAIM analyses were carried out on some optimized complexes, transition states and intermediates to figure out the intermolecular interactions.

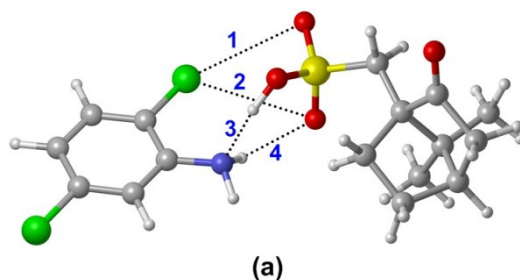

**Figure S1** Intermolecular interactions in **COM1-1** and numbers of bond critical points (BCPs No.).

**Table S1** Numbers of bond critical points (BCPs No.) and the corresponding distances between atoms ( $d$ , in Å), classifications of the intermolecular interactions, electron density ( $\rho$ , in a.u.) and its Laplacian value ( $\nabla^2\rho$ , in a.u.), the electronic kinetic energy density ( $G$ , in a.u.), the electronic potential energy density ( $V$ , in a.u.) and the electronic energy density ( $H$ , in a.u.) at the BCPs of **COM1-1**.

|                  | BCPs No. | Classification | $d$  | $\rho$ | $\nabla^2\rho$ | $G$    | $V$     | $H$     |
|------------------|----------|----------------|------|--------|----------------|--------|---------|---------|
| <b>COM1-1(a)</b> | 1        | lp... $\pi$    | 3.47 | 0.0055 | 0.0199         | 0.0040 | -0.0030 | 0.0010  |
|                  | 2        | lp... $\pi$    | 3.55 | 0.0055 | 0.0195         | 0.0040 | -0.0031 | 0.0009  |
|                  | 3        | O-H...N        | 1.72 | 0.0507 | 0.1019         | 0.0315 | -0.0376 | -0.0061 |
|                  | 4        | N-H...O        | 2.16 | 0.0187 | 0.0625         | 0.0157 | -0.0157 | 0.0000  |

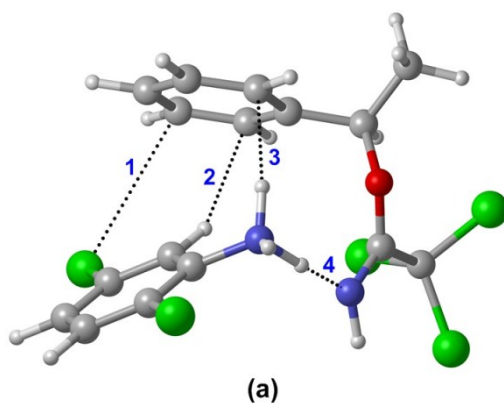

**Figure S2** Intermolecular interactions in **COM1-2** and numbers of bond critical points (BCPs No.).

**Table S2** Numbers of bond critical point (BCPs No.) and the corresponding distances between atoms ( $d$ , in Å), classifications of the intermolecular interactions, electron density ( $\rho$ , in a.u.) and its Laplacian value ( $\nabla^2\rho$ , in a.u.), the electronic kinetic energy density ( $G$ , in a.u.), the electronic potential energy density ( $V$ , in a.u.) and the electronic energy density ( $H$ , in a.u.) at the BCPs of **COM1-2**.

|                   | BCPs No. | Classification | $d$  | $\rho$ | $\nabla^2\rho$ | $G$    | $V$     | $H$     |
|-------------------|----------|----------------|------|--------|----------------|--------|---------|---------|
| <b>COM1-2 (a)</b> | 1        | lp... $\pi$    | 3.64 | 0.0046 | 0.0142         | 0.0028 | -0.0020 | 0.0008  |
|                   | 2        | C-H... $\pi$   | 2.70 | 0.0082 | 0.0252         | 0.0054 | -0.0044 | 0.0010  |
|                   | 3        | N-H... $\pi$   | 2.32 | 0.0140 | 0.0389         | 0.0092 | -0.0086 | 0.0006  |
|                   | 4        | N-H...N        | 1.51 | 0.0868 | 0.0701         | 0.0498 | -0.0820 | -0.0322 |

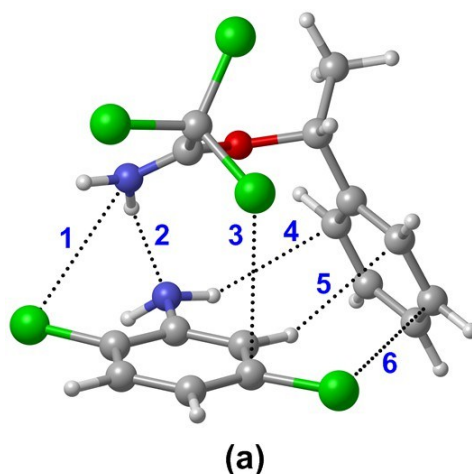

**Figure S3** Intermolecular interactions in **COMI-3** and numbers of bond critical points (BCPs No.).

**Table S3** Numbers of bond critical points (BCPs No.) and the corresponding distances between atoms ( $d$ , in Å), classifications of the intermolecular interactions, electron density ( $\rho$ , in a.u.) and its Laplacian value ( $\nabla^2\rho$ , in a.u.), the electronic kinetic energy density ( $G$ , in a.u.), the electronic potential energy density ( $V$ , in a.u.) and the electronic energy density ( $H$ , in a.u.) at the BCPs of **COMI-3**.

|                   | BCPs No. | Classification | $d$  | $\rho$ | $\nabla^2\rho$ | $G$    | $V$     | $H$     |
|-------------------|----------|----------------|------|--------|----------------|--------|---------|---------|
| <b>COMI-3 (a)</b> | 1        | lp... $\pi$    | 3.29 | 0.0076 | 0.0296         | 0.0060 | -0.0046 | 0.0014  |
|                   | 2        | N-H...N        | 1.93 | 0.0342 | 0.0806         | 0.0222 | -0.0242 | -0.0020 |
|                   | 3        | lp... $\pi$    | 3.51 | 0.0058 | 0.0188         | 0.0037 | -0.0028 | 0.0009  |
|                   | 4        | N-H... $\pi$   | 2.71 | 0.0067 | 0.0218         | 0.0044 | -0.0034 | 0.0010  |
|                   | 5        | lp... $\pi$    | 3.55 | 0.0056 | 0.0172         | 0.0034 | -0.0025 | 0.0009  |
|                   | 6        | C-H... $\pi$   | 2.74 | 0.0079 | 0.0281         | 0.0058 | -0.0045 | 0.0013  |

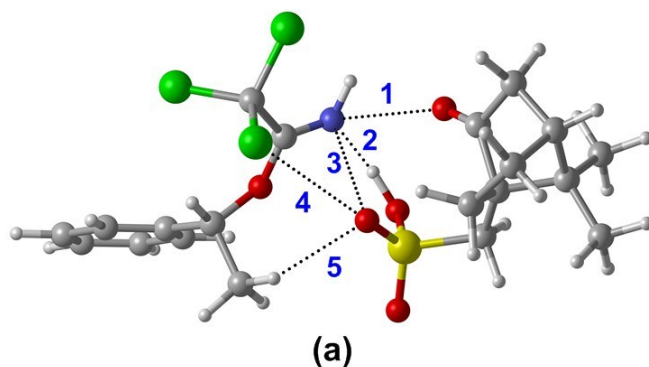

**Figure S4** Intermolecular interactions in **COM2-1** and numbers of bond critical points (BCPs No.)

**Table S4** Numbers of bond critical points (BCPs No.) and the corresponding distances between atoms ( $d$ , in Å), classifications of the intermolecular interactions, electron density ( $\rho$ , in a.u.) and its Laplacian value ( $\nabla^2\rho$ , in a.u.), the electronic kinetic energy density ( $G$ , in a.u.), the electronic potential energy density ( $V$ , in a.u.) and the electronic energy density ( $H$ , in a.u.) at the BCPs of **COM2-1**.

|                   | BCPs No. | Classification  | $d$  | $\rho$ | $\nabla^2\rho$ | $G$    | $V$     | $H$     |
|-------------------|----------|-----------------|------|--------|----------------|--------|---------|---------|
| <b>COM2-1 (a)</b> | 1        | lp... $\pi$     | 2.76 | 0.0136 | 0.0595         | 0.0127 | -0.0106 | 0.0021  |
|                   | 2        | O-H...N         | 1.55 | 0.0743 | 0.0943         | 0.0455 | -0.0675 | -0.0220 |
|                   | 3        | $\pi$ ... $\pi$ | 3.00 | 0.0115 | 0.0397         | 0.0091 | -0.0083 | 0.0008  |
|                   | 4        | lp...lp         | 3.27 | 0.0068 | 0.0259         | 0.0055 | -0.0045 | 0.0010  |
|                   | 5        | C-H...O         | 2.42 | 0.0116 | 0.0387         | 0.0091 | -0.0084 | 0.0007  |

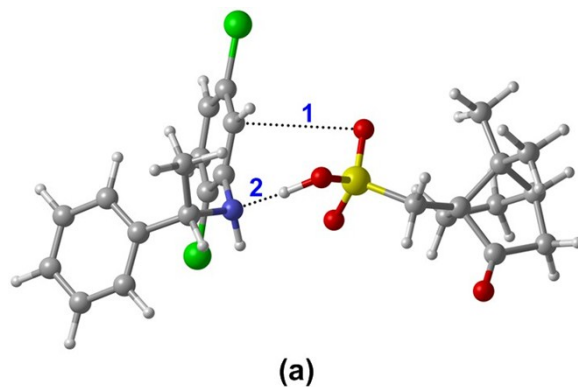

**Figure S5** Intermolecular interactions in **IM2** and numbers of bond critical points (BCPs No.).

**Table S5** Numbers of bond critical points (BCPs No.) and the corresponding distances between atoms ( $d$ , in Å), classifications of the intermolecular interactions, electron density ( $\rho$ , in a.u.) and its Laplacian value ( $\nabla^2\rho$ , in a.u.), the electronic kinetic energy density ( $G$ , in a.u.), the electronic potential energy density ( $V$ , in a.u.) and the electronic energy density ( $H$ , in a.u.) at the BCPs of **IM2**.

|               | BCPs No. | Classification  | $d$  | $\rho$ | $\nabla^2\rho$ | $G$    | $V$     | $H$     |
|---------------|----------|-----------------|------|--------|----------------|--------|---------|---------|
| <b>IM2(a)</b> | 1        | $\pi \dots \pi$ | 3.38 | 0.0054 | 0.0178         | 0.0037 | -0.0029 | 0.0008  |
|               | 2        | O-H...N         | 1.54 | 0.0829 | 0.0795         | 0.0490 | -0.0782 | -0.0292 |

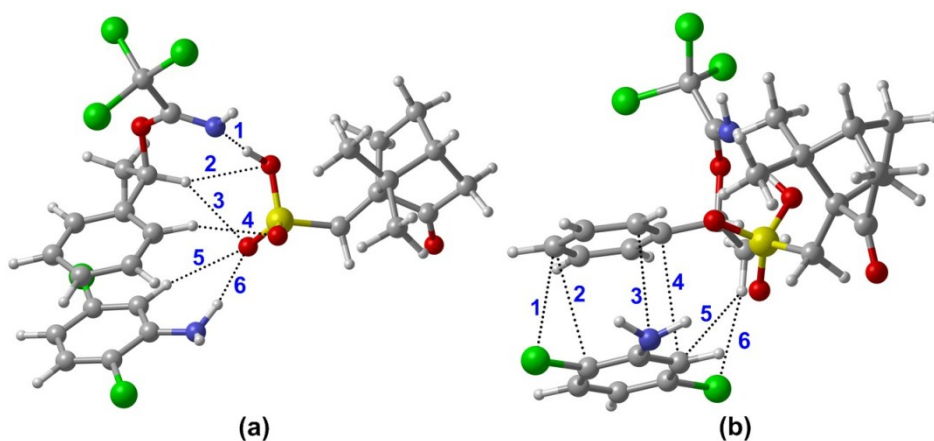

**Figure S6** Intermolecular interactions in **IM-BI1** and numbers of bond critical points (BCPs No.).

**Table S6** Numbers of bond critical points (BCPs No.) and the corresponding distances between atoms ( $d$ , in Å), classifications of the intermolecular interactions, electron density ( $\rho$ , in a.u.) and its Laplacian value ( $\nabla^2\rho$ , in a.u.), the electronic kinetic energy density ( $G$ , in a.u.), the electronic potential energy density ( $V$ , in a.u.) and the electronic energy density ( $H$ , in a.u.) at the BCPs of **IM-BI1**.

|                   | BCPs No. | Classification  | $d$  | $\rho$ | $\nabla^2\rho$ | $G$    | $V$     | $H$     |
|-------------------|----------|-----------------|------|--------|----------------|--------|---------|---------|
| <b>IM-BI1 (a)</b> | 1        | O-H...N         | 1.50 | 0.0855 | 0.0694         | 0.0509 | -0.0845 | -0.0336 |
|                   | 2        | C-H... $\pi$    | 2.40 | 0.0122 | 0.0428         | 0.0099 | -0.0090 | 0.0009  |
|                   | 3        | C-H... $\pi$    | 2.60 | 0.0087 | 0.0292         | 0.0066 | -0.0058 | 0.0008  |
|                   | 4        | C-H...O         | 2.38 | 0.0123 | 0.0367         | 0.0091 | -0.0090 | 0.0001  |
|                   | 5        | C-H...O         | 2.68 | 0.0056 | 0.0221         | 0.0046 | -0.0036 | 0.0010  |
|                   | 6        | N-H...O         | 2.03 | 0.0211 | 0.0640         | 0.0167 | -0.0174 | -0.0007 |
| <b>IM-BI1 (b)</b> | 1        | lp... $\pi$     | 3.50 | 0.0062 | 0.0204         | 0.0041 | -0.0031 | 0.0010  |
|                   | 2        | $\pi$ ... $\pi$ | 3.33 | 0.0068 | 0.0198         | 0.0042 | -0.0034 | 0.0008  |
|                   | 3        | $\pi$ ... $\pi$ | 3.31 | 0.0070 | 0.0200         | 0.0045 | -0.0039 | 0.0006  |
|                   | 4        | $\pi$ ... $\pi$ | 3.42 | 0.0063 | 0.0168         | 0.0035 | -0.0028 | 0.0007  |
|                   | 5        | C-H... $\pi$    | 2.95 | 0.0049 | 0.0168         | 0.0033 | -0.0024 | 0.0009  |
|                   | 6        | C-H...Cl        | 2.77 | 0.0085 | 0.0289         | 0.0059 | -0.0046 | 0.0013  |

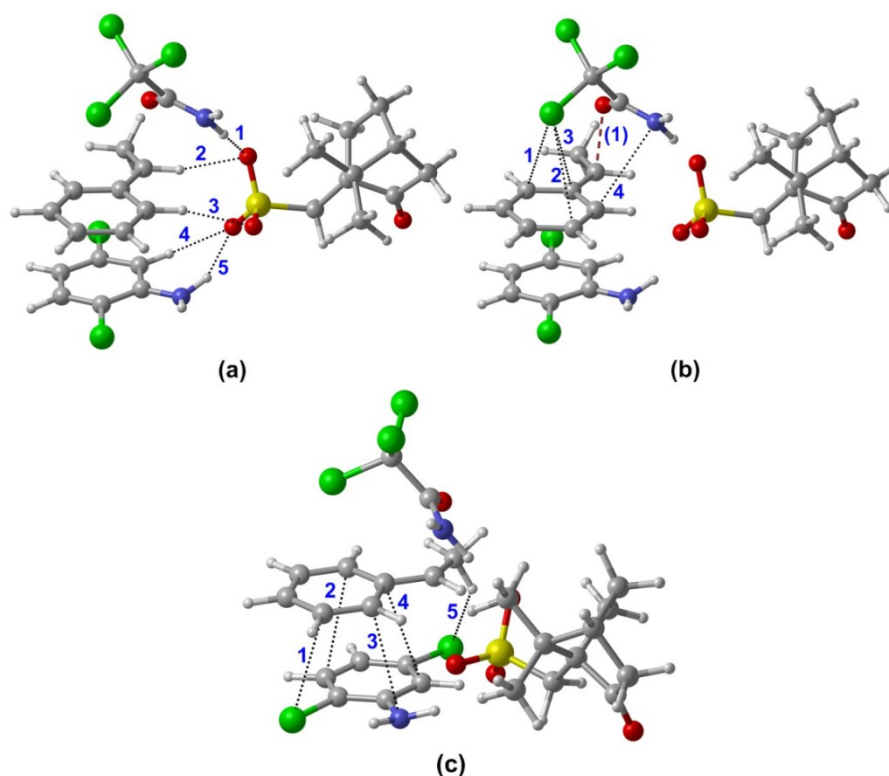

**Figure S7** Intermolecular interactions in **TS-BI1** and numbers of bond critical points (BCPs No.).

**Table S7** Numbers of bond critical points (BCPs No.) and the corresponding distances between atoms ( $d$ , in Å), classifications of the intermolecular interactions, electron density ( $\rho$ , in a.u.) and its Laplacian value ( $\nabla^2\rho$ , in a.u.), the electronic kinetic energy density ( $G$ , in a.u.), the electronic potential energy density ( $V$ , in a.u.) and the electronic energy density ( $H$ , in a.u.) at the BCPs of **TS-BI1**.

|                   | BCPs No. | Classification  | $d$  | $\rho$ | $\nabla^2\rho$ | $G$    | $V$     | $H$     |
|-------------------|----------|-----------------|------|--------|----------------|--------|---------|---------|
| <b>TS-BI1 (a)</b> | 1        | N-H...O         | 1.68 | 0.0463 | 0.1421         | 0.0366 | -0.0376 | -0.0010 |
|                   | 2        | C-H...O         | 2.16 | 0.0189 | 0.0532         | 0.0142 | -0.0151 | -0.0009 |
|                   | 3        | C-H...O         | 2.20 | 0.0175 | 0.0475         | 0.0127 | -0.0136 | -0.0009 |
|                   | 4        | C-H...O         | 2.39 | 0.0108 | 0.0400         | 0.0090 | -0.0080 | 0.0010  |
|                   | 5        | N-H...O         | 1.95 | 0.0261 | 0.0796         | 0.0208 | -0.0217 | -0.0009 |
| <b>TS-BI1 (b)</b> | (1)      | C...O           | 2.31 | 0.0305 | 0.0939         | 0.0236 | -0.0238 | -0.0002 |
|                   | 1        | lp... $\pi$     | 3.59 | 0.0056 | 0.0181         | 0.0037 | -0.0028 | 0.0009  |
|                   | 2        | lp... $\pi$     | 3.59 | 0.0057 | 0.0183         | 0.0037 | -0.0028 | 0.0009  |
|                   | 3        | lp... $\pi$     | 3.60 | 0.0056 | 0.0183         | 0.0037 | -0.0028 | 0.0009  |
| <b>TS-BI1 (c)</b> | 4        | $\pi$ ... $\pi$ | 3.29 | 0.0072 | 0.0217         | 0.0046 | -0.0038 | 0.0008  |
|                   | 1        | lp... $\pi$     | 3.44 | 0.0073 | 0.0231         | 0.0046 | -0.0035 | 0.0011  |
|                   | 2        | $\pi$ ... $\pi$ | 3.47 | 0.0060 | 0.0161         | 0.0034 | -0.0027 | 0.0007  |
|                   | 3        | $\pi$ ... $\pi$ | 3.24 | 0.0076 | 0.0224         | 0.0049 | -0.0043 | 0.0006  |
|                   | 4        | $\pi$ ... $\pi$ | 3.36 | 0.0076 | 0.0203         | 0.0042 | -0.0034 | 0.0008  |
|                   | 5        | C-H...Cl        | 2.66 | 0.0107 | 0.0373         | 0.0078 | -0.0062 | 0.0016  |



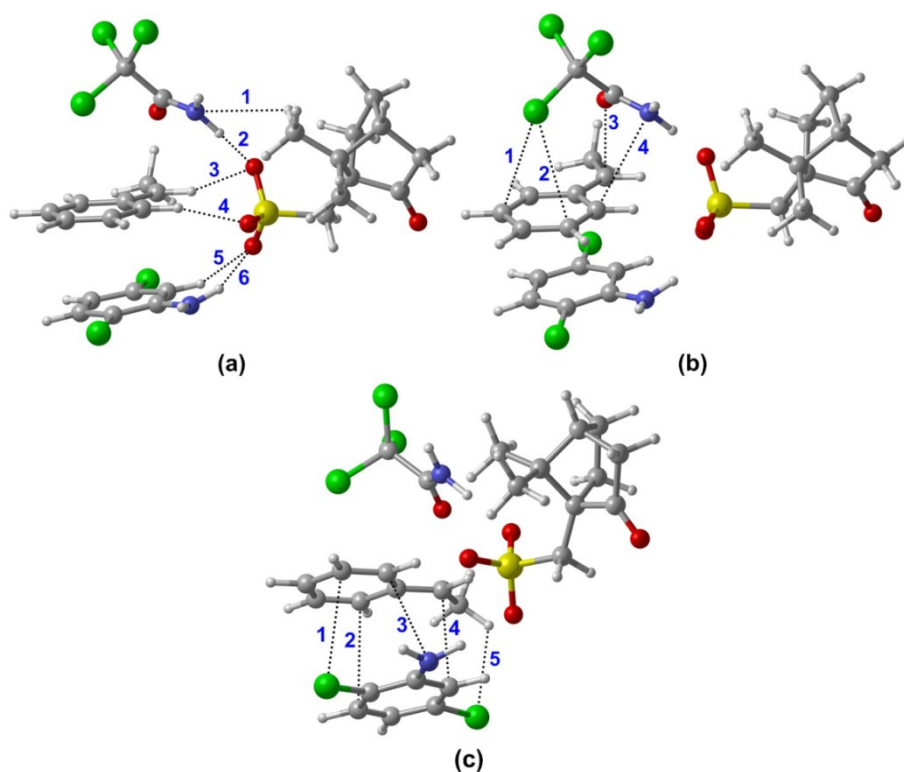

**Figure S8** Intermolecular interactions in **IM-BI2** and numbers of bond critical points (BCPs No.)

**Table S8** Numbers of Bond Critical Point (BCPs No.) and the corresponding distances between atoms ( $d$ , in Å), classifications of the intermolecular interactions, electron density ( $\rho$ , in a.u.), its Laplacian value ( $\nabla^2\rho$ , in a.u.), the electronic kinetic energy density ( $G$ , in a.u.), the electronic potential energy density ( $V$ , in a.u.) and the electronic energy density ( $H$ , in a.u.) at the BCPs of **IM-BI2**.

|                   | BCPs No. | Classification  | $d$  | $\rho$ | $\nabla^2\rho$ | $G$    | $V$     | $H$     |
|-------------------|----------|-----------------|------|--------|----------------|--------|---------|---------|
| <b>IM-BI2 (a)</b> | 1        | C-H... $\pi$    | 2.84 | 0.0061 | 0.0252         | 0.0049 | -0.0035 | 0.0014  |
|                   | 2        | N-H...O         | 1.71 | 0.0418 | 0.1336         | 0.0334 | -0.0334 | 0.0000  |
|                   | 3        | C-H... $\pi$    | 2.22 | 0.0168 | 0.0477         | 0.0126 | -0.0132 | -0.0006 |
|                   | 4        | C-H...O         | 2.19 | 0.0180 | 0.0487         | 0.0131 | -0.0140 | -0.0009 |
|                   | 5        | C-H...O         | 2.37 | 0.0113 | 0.0417         | 0.0094 | -0.0084 | 0.0010  |
|                   | 6        | N-H...O         | 1.94 | 0.0270 | 0.0828         | 0.0216 | -0.0225 | -0.0009 |
| <b>IM-BI2 (b)</b> | 1        | lp... $\pi$     | 3.53 | 0.0060 | 0.0200         | 0.0040 | -0.0030 | 0.0010  |
|                   | 2        | lp... $\pi$     | 3.54 | 0.0062 | 0.0202         | 0.0041 | -0.0031 | 0.0010  |
|                   | 3        | lp... $\pi$     | 2.51 | 0.0199 | 0.0660         | 0.0158 | -0.0150 | 0.0008  |
|                   | 4        | $\pi$ ... $\pi$ | 3.31 | 0.0067 | 0.0201         | 0.0043 | -0.0035 | 0.0008  |
| <b>IM-BI2 (c)</b> | 1        | lp... $\pi$     | 3.47 | 0.0068 | 0.0211         | 0.0042 | -0.0032 | 0.0010  |
|                   | 2        | $\pi$ ... $\pi$ | 3.36 | 0.0065 | 0.0180         | 0.0037 | -0.0030 | 0.0007  |
|                   | 3        | lp... $\pi$     | 3.26 | 0.0073 | 0.0216         | 0.0047 | -0.0041 | 0.0006  |
|                   | 4        | $\pi$ ... $\pi$ | 3.08 | 0.0093 | 0.0245         | 0.0050 | -0.0039 | 0.0011  |
|                   | 5        | C-H...Cl        | 2.76 | 0.0094 | 0.0350         | 0.0069 | -0.0051 | 0.0018  |

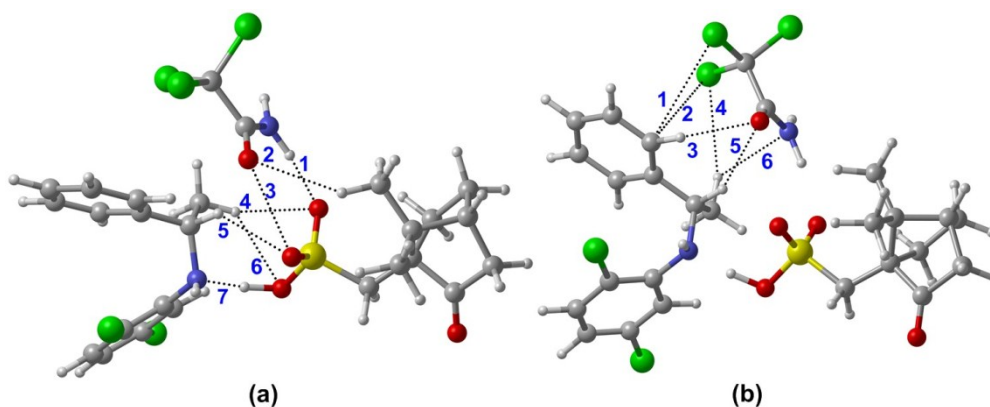

**Figure S9** Intermolecular interactions in **IM-BI3** and numbers of bond critical points (BCPs No.).

**Table S9** Numbers of bond critical points (BCPs No.) and the corresponding distances between atoms ( $d$ , in Å), classifications of the intermolecular interactions, electron density ( $\rho$ , in a.u.) and its Laplacian value ( $\nabla^2\rho$ , in a.u.), the electronic kinetic energy density ( $G$ , in a.u.), the electronic potential energy density ( $V$ , in a.u.) and the electronic energy density ( $H$ , in a.u.) at the BCPs of **IM-BI3**.

|                   | BCPs No. | Classification | $d$  | $\rho$ | $\nabla^2\rho$ | $G$    | $V$     | $H$     |
|-------------------|----------|----------------|------|--------|----------------|--------|---------|---------|
| <b>IM-BI3 (a)</b> | 1        | N-H...O        | 1.89 | 0.0273 | 0.0870         | 0.0218 | -0.0219 | -0.0001 |
|                   | 2        | C-H...O        | 2.72 | 0.0057 | 0.0208         | 0.0044 | -0.0035 | 0.0009  |
|                   | 3        | lp...lp        | 3.13 | 0.0064 | 0.0247         | 0.0056 | -0.0050 | 0.0006  |
|                   | 4        | C-H... $\pi$   | 2.60 | 3.1275 | 0.0290         | 0.0064 | -0.0056 | 0.0008  |
|                   | 5        | C-H...O        | 2.45 | 0.0117 | 0.0389         | 0.0091 | -0.0085 | 0.0006  |
|                   | 6        | C-H... $\pi$   | 2.65 | 0.0080 | 0.0307         | 0.0065 | -0.0054 | 0.0011  |
|                   | 7        | O-H...N        | 1.43 | 0.1104 | -0.0275        | 0.0586 | -0.1242 | -0.0656 |
| <b>IM-BI3 (b)</b> | 1        | lp... $\pi$    | 3.65 | 0.0047 | 0.0161         | 0.0031 | -0.0022 | 0.0009  |
|                   | 2        | lp... $\pi$    | 3.66 | 0.0049 | 0.0144         | 0.0029 | -0.0022 | 0.0007  |
|                   | 3        | C-H... $\pi$   | 2.37 | 0.0117 | 0.0394         | 0.0092 | -0.0086 | 0.0006  |
|                   | 4        | C-H...Cl       | 3.13 | 0.0044 | 0.0144         | 0.0027 | -0.0019 | 0.0008  |
|                   | 5        | C-H... $\pi$   | 2.49 | 0.0095 | 0.0325         | 0.0074 | -0.0067 | 0.0007  |
|                   | 6        | C-H... $\pi$   | 2.88 | 0.0063 | 0.0201         | 0.0043 | -0.0035 | 0.0008  |

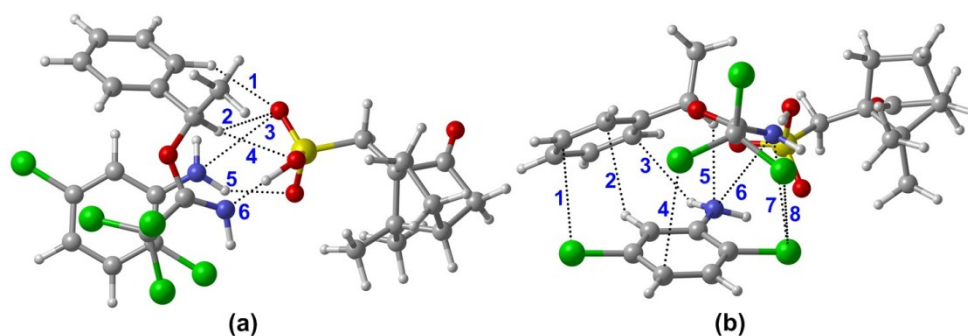

**Figure S10** Intermolecular interactions in **IM-BIII** and numbers of bond critical points (BCPs No.).

**Table S10** Numbers of bond critical points (BCPs No.) and the corresponding distances between atoms ( $d$ , in Å), classifications of the intermolecular interactions, electron density ( $\rho$ , in a.u.) and its Laplacian value ( $\nabla^2\rho$ , in a.u.), the electronic kinetic energy density ( $G$ , in a.u.), the electronic potential energy density ( $V$ , in a.u.) and the electronic energy density ( $H$ , in a.u.) at the BCPs of **IM-BIII**.

|                    | BCPs No. | Classification | $d$  | $\rho$ | $\nabla^2\rho$ | $G$    | $V$     | $H$     |
|--------------------|----------|----------------|------|--------|----------------|--------|---------|---------|
| <b>IM-BIII (a)</b> | 1        | C-H...O        | 2.41 | 0.0100 | 0.0343         | 0.0079 | -0.0073 | 0.0006  |
|                    | 2        | C-H... $\pi$   | 2.51 | 0.0101 | 0.0330         | 0.0077 | -0.0072 | 0.0005  |
|                    | 3        | lp... $\pi$    | 3.07 | 0.0084 | 0.0300         | 0.0067 | -0.0060 | 0.0007  |
|                    | 4        | C-H... $\pi$   | 2.42 | 0.0125 | 0.0491         | 0.0109 | -0.0094 | 0.0015  |
|                    | 5        | N-H...O        | 2.09 | 0.0199 | 0.0628         | 0.0162 | -0.0167 | -0.0005 |
|                    | 6        | O-H...N        | 1.49 | 0.0876 | 0.0619         | 0.0516 | -0.0878 | -0.0362 |
| <b>IM-BIII (b)</b> | 1        | lp... $\pi$    | 3.78 | 0.0036 | 0.0109         | 0.0021 | -0.0016 | 0.0005  |
|                    | 2        | C-H... $\pi$   | 2.81 | 0.0077 | 0.0267         | 0.0053 | -0.0039 | 0.0014  |
|                    | 3        | N-H... $\pi$   | 2.64 | 0.0078 | 0.0276         | 0.0056 | -0.0043 | 0.0013  |
|                    | 4        | lp... $\pi$    | 3.39 | 0.0078 | 0.0255         | 0.0052 | -0.0040 | 0.0012  |
|                    | 5        | C-H...N        | 2.47 | 0.0131 | 0.0387         | 0.0091 | -0.0085 | 0.0006  |
|                    | 6        | lp... $\pi$    | 3.23 | 0.0082 | 0.0227         | 0.0055 | -0.0053 | 0.0002  |
|                    | 7        | lp... $\pi$    | 3.38 | 0.0072 | 0.0253         | 0.0052 | -0.0040 | 0.0012  |
|                    | 8        | lp...lp        | 3.63 | 0.0062 | 0.0213         | 0.0042 | -0.0030 | 0.0012  |

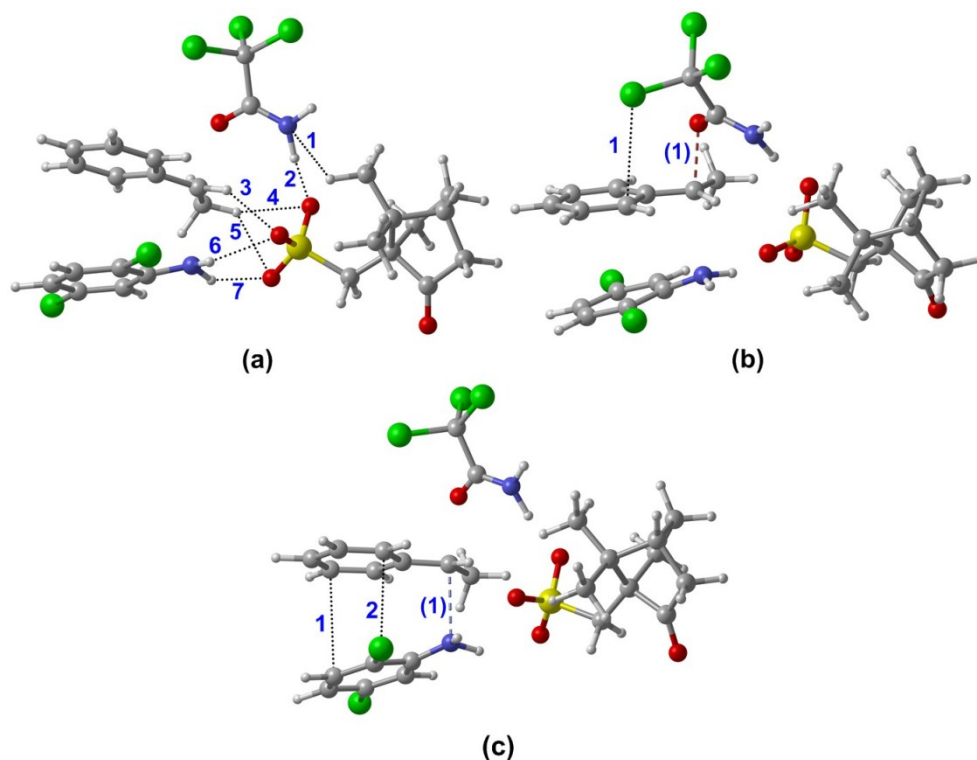

**Figure S11** Intermolecular interactions in **TS-BIII1** and numbers of bond critical points (BCPs No.).

**Table S11** Numbers of bond critical points (BCPs No.) and the corresponding distances between atoms ( $d$ , in Å), classifications of the intermolecular interactions, electron density ( $\rho$ , in a.u.) and its Laplacian value ( $\nabla^2\rho$ , in a.u.), the electronic kinetic energy density ( $G$ , in a.u.), the electronic potential energy density ( $V$ , in a.u.) and the electronic energy density ( $H$ , in a.u.) at the BCPs of **TS-BIII1**.

|                     | BCPs No. | Classification  | $d$  | $\rho$ | $\nabla^2\rho$ | $G$    | $V$     | $H$     |
|---------------------|----------|-----------------|------|--------|----------------|--------|---------|---------|
| <b>TS-BIII1 (a)</b> | 1        | C-H... $\pi$    | 2.73 | 0.0074 | 0.0291         | 0.0058 | -0.0043 | 0.0015  |
|                     | 2        | N-H...O         | 1.64 | 0.0514 | 0.1469         | 0.0395 | -0.0424 | -0.0029 |
|                     | 3        | C-H...O         | 2.32 | 0.0145 | 0.0418         | 0.0107 | -0.0109 | -0.0002 |
|                     | 4        | C-H...O         | 2.57 | 0.0087 | 0.0309         | 0.0068 | -0.0060 | 0.0008  |
|                     | 5        | C-H...O         | 2.57 | 0.0095 | 0.0342         | 0.0075 | -0.0064 | 0.0011  |
|                     | 6        | N-H...O         | 2.22 | 0.0167 | 0.0586         | 0.0142 | -0.0138 | 0.0004  |
|                     | 7        | N-H...O         | 1.94 | 0.0273 | 0.0857         | 0.0222 | -0.0230 | -0.0008 |
| <b>TS-BIII1 (b)</b> | (1)      | C...O           | 2.11 | 0.0471 | 0.1261         | 0.0352 | -0.0388 | -0.0036 |
|                     | 1        | lp... $\pi$     | 3.54 | 0.0053 | 0.0163         | 0.0032 | -0.0023 | 0.0009  |
| <b>TS-BIII1 (c)</b> | (1)      | C...N           | 2.55 | 0.0249 | 0.0646         | 0.0158 | -0.0156 | 0.0002  |
|                     | 1        | $\pi$ ... $\pi$ | 3.68 | 0.0042 | 0.0120         | 0.0025 | -0.0020 | 0.0005  |
|                     | 2        | lp... $\pi$     | 3.36 | 0.0076 | 0.0250         | 0.0050 | -0.0039 | 0.0011  |

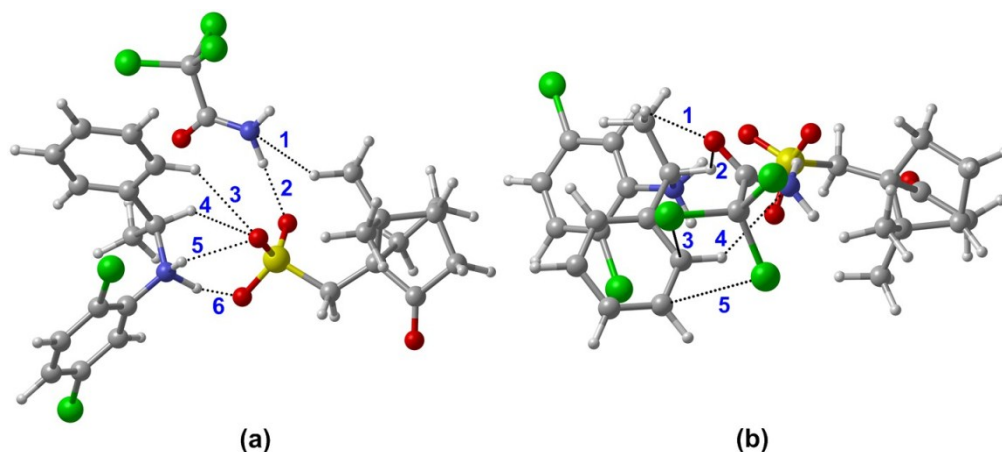

**Figure S12** Intermolecular interactions in **IM-BII2** and numbers of bond critical points (BCPs No.).

**Table S12** Numbers of bond critical points (BCPs No.) and the corresponding distances between atoms ( $d$ , in Å), classifications of the intermolecular interactions, electron density ( $\rho$ , in a.u.) and its Laplacian value ( $\nabla^2\rho$ , in a.u.), the electronic kinetic energy density ( $G$ , in a.u.), the electronic potential energy density ( $V$ , in a.u.) and the electronic energy density ( $H$ , in a.u.) at the BCPs of **IM-BII2**.

|                    | BCPs No. | Classification | $d$  | $\rho$ | $\nabla^2\rho$ | $G$    | $V$     | $H$     |
|--------------------|----------|----------------|------|--------|----------------|--------|---------|---------|
| <b>IM-BII2 (a)</b> | 1        | C-H... $\pi$   | 2.82 | 0.0056 | 0.0217         | 0.0043 | -0.0031 | 0.0012  |
|                    | 2        | N-H...O        | 1.86 | 0.0299 | 0.0941         | 0.0236 | -0.0238 | -0.0002 |
|                    | 3        | C-H...O        | 2.62 | 0.0072 | 0.0257         | 0.0056 | -0.0047 | 0.0009  |
|                    | 4        | C-H... $\pi$   | 2.52 | 0.0115 | 0.0413         | 0.0092 | -0.0082 | 0.0010  |
|                    | 5        | N-H...O        | 2.24 | 0.0175 | 0.0646         | 0.0152 | -0.0144 | 0.0008  |
|                    | 6        | N-H...O        | 1.47 | 0.0859 | 0.1419         | 0.0627 | -0.0898 | -0.0271 |
| <b>IM-BII2 (b)</b> | 1        | C-H...O        | 2.37 | 0.0114 | 0.0438         | 0.0097 | -0.0084 | 0.0013  |
|                    | 2        | C-H... $\pi$   | 2.44 | 0.0120 | 0.0459         | 0.0102 | -0.0088 | 0.0014  |
|                    | 3        | lp... $\pi$    | 3.63 | 0.0054 | 0.0171         | 0.0035 | -0.0027 | 0.0008  |
|                    | 4        | C-H... $\pi$   | 2.89 | 0.0062 | 0.0201         | 0.0042 | -0.0033 | 0.0009  |
|                    | 5        | lp... $\pi$    | 3.55 | 0.0056 | 0.0177         | 0.0035 | -0.0026 | 0.0009  |

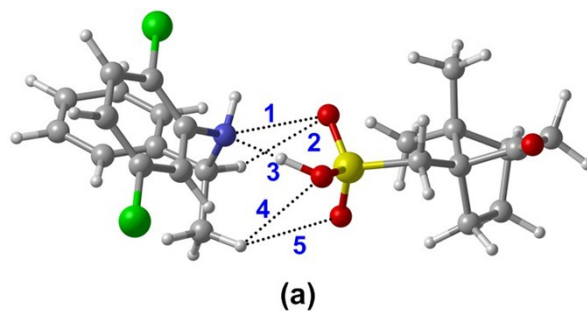

**Figure S13** Intermolecular interactions in **IM-BII3** and numbers of bond critical points (BCPs No.)

**Table S13** Numbers of bond critical point (BCPs No.) and the corresponding distances between atoms ( $d$ , in Å), classifications of the intermolecular interactions, electron density ( $\rho$ , in a.u.) and its Laplacian value ( $\nabla^2\rho$ , in a.u.), the electronic kinetic energy density ( $G$ , in a.u.), the electronic potential energy density ( $V$ , in a.u.) and the electronic energy density ( $H$ , in a.u.) at the BCPs of **IM-BII3**.

|                    | BCPs No. | Classification | $d$  | $\rho$ | $\nabla^2\rho$ | $G$    | $V$     | $H$     |
|--------------------|----------|----------------|------|--------|----------------|--------|---------|---------|
| <b>IM-BII3 (a)</b> | 1        | lp... $\pi$    | 2.96 | 0.0111 | 0.0422         | 0.0097 | -0.0088 | 0.0009  |
|                    | 2        | C-H... $\pi$   | 2.52 | 0.0106 | 0.0374         | 0.0084 | -0.0074 | 0.0010  |
|                    | 3        | O-H...N        | 1.53 | 0.0841 | 0.0741         | 0.0492 | -0.0798 | -0.0306 |
|                    | 4        | C-H...O        | 2.70 | 0.0071 | 0.0287         | 0.0059 | -0.0046 | 0.0013  |
|                    | 5        | C-H...O        | 2.91 | 0.0048 | 0.0185         | 0.0037 | -0.0028 | 0.0009  |

## 2. Cartesian Coordinates

### R1

|    |             |             |             |
|----|-------------|-------------|-------------|
| C  | 0.64651600  | 0.92912700  | -0.00841900 |
| C  | -0.75222500 | 1.02592700  | -0.00622100 |
| C  | -1.53238800 | -0.11929100 | -0.00086900 |
| C  | -0.97376900 | -1.39226500 | 0.00330800  |
| C  | 0.41214100  | -1.49713400 | 0.00220400  |
| C  | 1.20501100  | -0.35946400 | -0.00363500 |
| H  | -1.22361500 | 2.00292400  | -0.01584300 |
| H  | -1.60374900 | -2.27263600 | 0.00786000  |
| H  | 0.89009600  | -2.47044700 | 0.00808700  |
| N  | 1.43330300  | 2.06026200  | -0.06702500 |
| H  | 0.99956300  | 2.91504600  | 0.24549500  |
| H  | 2.39085000  | 1.95134500  | 0.23234700  |
| Cl | 2.94442200  | -0.52569300 | 0.00126000  |
| Cl | -3.26900900 | 0.05101900  | 0.00303600  |

### R2

|    |             |             |             |
|----|-------------|-------------|-------------|
| C  | 2.96062400  | -1.03738500 | 0.67749900  |
| C  | 2.21826600  | 0.03716600  | 0.18971500  |
| C  | 2.81255800  | 0.93543400  | -0.69658000 |
| C  | 4.13491900  | 0.75639400  | -1.09025000 |
| C  | 4.87523700  | -0.31459600 | -0.59659600 |
| C  | 4.28548400  | -1.21203200 | 0.28931700  |
| H  | 2.49778100  | -1.74367800 | 1.36276000  |
| H  | 2.22935500  | 1.76330500  | -1.08630500 |
| H  | 4.58755300  | 1.45518300  | -1.78652000 |
| H  | 5.90638700  | -0.45270800 | -0.90518700 |
| H  | 4.85358400  | -2.05376100 | 0.67224300  |
| C  | 0.81009400  | 0.25021300  | 0.68901300  |
| C  | 0.77413100  | 1.15218900  | 1.91622700  |
| H  | 0.36488900  | -0.72440800 | 0.91546700  |
| H  | -0.25278100 | 1.32688500  | 2.25052400  |
| H  | 1.33024200  | 0.68559400  | 2.73285700  |
| H  | 1.24507100  | 2.11052000  | 1.68009200  |
| O  | 0.07031500  | 0.87449100  | -0.38621000 |
| C  | -1.26282100 | 1.06468400  | -0.26779400 |
| C  | -2.13851300 | -0.20743100 | -0.17841300 |
| Cl | -1.39127900 | -1.53630200 | -1.09606200 |
| Cl | -2.27040000 | -0.67977300 | 1.55036000  |
| Cl | -3.76380900 | 0.09062900  | -0.80508300 |
| N  | -1.82835000 | 2.18655800  | -0.29319400 |
| H  | -1.11273300 | 2.91601700  | -0.32338000 |

**CSA**

|   |             |             |             |
|---|-------------|-------------|-------------|
| C | 2.64162400  | 0.03681200  | 0.53721300  |
| C | 2.27559200  | 1.52916500  | 0.44000100  |
| C | 0.44582200  | -0.02262900 | -0.05080600 |
| C | 0.45748100  | -0.48555400 | 1.43640500  |
| C | 1.96522300  | -0.50260100 | 1.81034100  |
| H | 2.35121600  | 2.05829600  | 1.39450900  |
| H | 2.86371500  | 2.08704600  | -0.29355400 |
| H | 3.71310000  | -0.16874900 | 0.46847900  |
| H | -0.13139200 | 0.19304000  | 2.05836000  |
| H | -0.00317200 | -1.47290500 | 1.52340500  |
| H | 2.18354400  | 0.12507400  | 2.67767000  |
| H | 2.30551700  | -1.51295200 | 2.04821200  |
| C | -0.80048900 | -0.28975400 | -0.87375000 |
| H | -0.89697500 | 0.45694000  | -1.66651700 |
| H | -0.82217100 | -1.29709900 | -1.29943300 |
| S | -2.29660500 | -0.17216500 | 0.10834200  |
| O | -2.53542900 | -1.45244800 | 0.73657800  |
| O | -2.30358400 | 1.05575100  | 0.88056800  |
| O | -3.40605400 | 0.00311000  | -1.05970900 |
| H | -3.72043900 | 0.92035500  | -1.01720600 |
| O | 0.14297800  | 2.37197400  | -0.43495800 |
| C | 0.82187500  | 1.46098600  | -0.03657000 |
| C | 1.78848700  | -0.61125700 | -0.59492000 |
| C | 2.13829900  | -0.11640600 | -2.00239900 |
| H | 3.15676600  | -0.41912200 | -2.26543500 |
| H | 1.46308600  | -0.56285800 | -2.74025200 |
| H | 2.07024000  | 0.96879300  | -2.11473300 |
| C | 1.83956100  | -2.13919500 | -0.60250400 |
| H | 2.86788300  | -2.47177600 | -0.78016400 |
| H | 1.49613300  | -2.59149400 | 0.32892800  |
| H | 1.22450400  | -2.54245100 | -1.41364400 |



CSA-

|   |             |             |             |
|---|-------------|-------------|-------------|
| C | -2.47527000 | -0.61525200 | -0.46955100 |
| C | -2.86385100 | 0.82140100  | -0.09911300 |
| C | -0.45048700 | 0.32470100  | 0.04680300  |
| C | -0.41982100 | 0.14587600  | -1.50616200 |
| C | -1.77789600 | -0.53335600 | -1.83957700 |
| H | -3.34175600 | 1.37781800  | -0.91149600 |
| H | -3.51344200 | 0.89014500  | 0.77898000  |
| H | -3.29713800 | -1.33703700 | -0.41395200 |
| H | -0.27087800 | 1.10363200  | -2.01025100 |
| H | 0.43359800  | -0.48021600 | -1.76730900 |
| H | -2.37564000 | 0.04290100  | -2.55388800 |
| H | -1.62763100 | -1.52664000 | -2.27040700 |
| C | 0.85792200  | 0.64165200  | 0.75244400  |
| H | 0.97414500  | 1.72662000  | 0.83014500  |
| H | 0.85612100  | 0.23419400  | 1.76858900  |
| S | 2.38674800  | 0.04228500  | -0.02573700 |
| O | 2.15887300  | -1.40593000 | -0.25157700 |
| O | 2.49854600  | 0.82159600  | -1.27618300 |
| O | 3.41537800  | 0.34625100  | 0.98519500  |
| O | -1.30579500 | 2.57126600  | 0.58389800  |
| C | -1.49335100 | 1.42974200  | 0.23782700  |
| C | -1.29175900 | -0.91394800 | 0.49624500  |
| C | -1.68819700 | -0.85800500 | 1.97657500  |
| H | -2.47231900 | -1.59500700 | 2.18716400  |
| H | -0.82653800 | -1.10484800 | 2.60380900  |
| H | -2.05043500 | 0.12406900  | 2.29603100  |
| C | -0.63513900 | -2.26894400 | 0.23784800  |
| H | -1.36553700 | -3.06636500 | 0.43112200  |
| H | -0.25067500 | -2.37221400 | -0.77644400 |
| H | 0.23124000  | -2.40228500 | 0.88899400  |

**H<sub>2</sub>NCOCCL<sub>3</sub>**

|    |             |             |             |
|----|-------------|-------------|-------------|
| C  | 1.25669600  | -0.52462700 | -0.08939600 |
| N  | 2.19335200  | 0.44678900  | -0.07916800 |
| H  | 1.96372100  | 1.42692200  | -0.08872500 |
| O  | 1.47784000  | -1.70813200 | -0.11896400 |
| C  | -0.21427400 | 0.01528600  | -0.00404300 |
| Cl | -0.46424800 | 1.31817600  | -1.20506000 |
| Cl | -1.35017600 | -1.29188800 | -0.29905200 |
| Cl | -0.45341200 | 0.68006800  | 1.63640700  |
| H  | 3.15878300  | 0.15859700  | -0.09376900 |

|          |             |             |             |
|----------|-------------|-------------|-------------|
| <b>P</b> |             |             |             |
| C        | 3.21791100  | 0.63778800  | -0.38951300 |
| C        | 1.94393500  | 0.96672700  | 0.07470200  |
| C        | 1.51929400  | 0.44459000  | 1.29852500  |
| C        | 2.34397600  | -0.40544800 | 2.02967000  |
| C        | 3.60935900  | -0.73339900 | 1.55284200  |
| C        | 4.04813100  | -0.20482300 | 0.34157700  |
| H        | 3.55298600  | 1.03454600  | -1.34439900 |
| H        | 0.52955000  | 0.68210300  | 1.67897200  |
| H        | 1.99542600  | -0.81160800 | 2.97395700  |
| H        | 4.25227300  | -1.39520100 | 2.12437100  |
| H        | 5.03520600  | -0.45251900 | -0.03592600 |
| C        | 1.04162300  | 1.84465900  | -0.76844200 |
| H        | 1.67859500  | 2.35249200  | -1.50136800 |
| C        | -0.47544200 | -1.17539100 | -0.67282400 |
| C        | -0.78624100 | 0.17549700  | -0.89800900 |
| C        | -2.02845100 | 0.64046400  | -0.45033500 |
| C        | -2.90991700 | -0.20333500 | 0.21200200  |
| C        | -2.58006900 | -1.52879500 | 0.46191300  |
| C        | -1.35574300 | -2.00761300 | 0.01112100  |
| H        | -2.30118300 | 1.67690000  | -0.62314700 |
| H        | -3.27230300 | -2.17677300 | 0.98655500  |
| H        | -1.08166200 | -3.04395300 | 0.17243600  |
| N        | 0.11277000  | 1.02518000  | -1.59515700 |
| H        | -0.42565500 | 1.66368600  | -2.17463500 |
| C        | 0.32445200  | 2.91566300  | 0.05831700  |
| H        | 1.04927900  | 3.52253900  | 0.60719600  |
| H        | -0.25408700 | 3.57815900  | -0.59437200 |
| H        | -0.36416800 | 2.47360600  | 0.78317800  |
| Cl       | 0.99751700  | -1.85958300 | -1.28016600 |
| Cl       | -4.44813900 | 0.41959900  | 0.74746000  |

**COMI-1**

|    |             |             |             |
|----|-------------|-------------|-------------|
| C  | 3.15362900  | -1.21596100 | -1.28241100 |
| C  | 1.82557100  | -1.64926000 | -1.27974200 |
| C  | 1.45202100  | -2.69777500 | -0.43314900 |
| C  | 2.39550800  | -3.29679300 | 0.39464700  |
| C  | 3.71825700  | -2.85851100 | 0.38527900  |
| C  | 4.09805500  | -1.81771600 | -0.45665400 |
| H  | 3.44244400  | -0.38876200 | -1.92645800 |
| H  | 0.41662200  | -3.02036100 | -0.39144500 |
| H  | 2.09563700  | -4.10410300 | 1.05474200  |
| H  | 4.44963000  | -3.32434400 | 1.03773200  |
| H  | 5.12528100  | -1.46858300 | -0.46476500 |
| C  | 0.82076700  | -0.92542900 | -2.11288000 |
| C  | -0.27469000 | -1.74130700 | -2.75941300 |
| H  | 1.31298800  | -0.25193600 | -2.81929400 |
| H  | -0.93832600 | -1.10094800 | -3.34602600 |
| H  | 0.16795100  | -2.48442000 | -3.42851700 |
| H  | -0.87732000 | -2.25775900 | -2.00852500 |
| O  | -1.35310200 | -1.49840000 | 0.45821800  |
| C  | -2.59078000 | -1.31809600 | 0.91036700  |
| C  | -3.29319800 | -0.03608600 | 0.41863400  |
| Cl | -2.32200200 | 1.37799200  | 0.93580000  |
| Cl | -3.34763800 | -0.08020400 | -1.37836900 |
| Cl | -4.93090200 | 0.12365400  | 1.03739600  |
| N  | -3.21874000 | -2.09472900 | 1.67947100  |
| H  | -2.61418200 | -2.88540900 | 1.91045300  |
| C  | 0.88507300  | 0.98310700  | -0.32441300 |
| C  | 1.32386200  | 0.53462800  | 0.92450900  |
| C  | 2.25004300  | 1.27778400  | 1.64076800  |
| C  | 2.74420000  | 2.48381800  | 1.15322400  |
| C  | 2.30317900  | 2.94303100  | -0.08185400 |
| C  | 1.39170400  | 2.19244700  | -0.81428600 |
| H  | 0.93090400  | -0.39816900 | 1.31625200  |
| H  | 3.46037900  | 3.05451900  | 1.73239600  |
| H  | 2.66976400  | 3.88037600  | -0.48430200 |
| N  | -0.02591100 | 0.17298600  | -1.04558500 |
| H  | -0.93894300 | -0.75978200 | -0.12936500 |
| H  | -0.56774000 | 0.75058600  | -1.68948900 |
| Cl | 0.87206700  | 2.77244400  | -2.37744300 |
| Cl | 2.79806700  | 0.69147900  | 3.18484600  |

**pR1**

|    |             |             |             |
|----|-------------|-------------|-------------|
| C  | -0.60443500 | 0.84017100  | 0.00003400  |
| C  | 0.77065500  | 1.01670900  | 0.00002800  |
| C  | 1.57784700  | -0.11697600 | -0.00008200 |
| C  | 1.00816400  | -1.39111500 | -0.00015100 |
| C  | -0.37217600 | -1.54099200 | -0.00018000 |
| C  | -1.19560600 | -0.41888200 | -0.00019100 |
| H  | 1.21888700  | 2.00591900  | 0.00020200  |
| H  | 1.65051800  | -2.26449500 | -0.00011200 |
| H  | -0.82004900 | -2.52838000 | -0.00010600 |
| N  | -1.47240000 | 2.03816700  | -0.00013600 |
| H  | -1.31930800 | 2.61727900  | -0.83465900 |
| H  | -2.46166900 | 1.74537300  | 0.00471700  |
| Cl | -2.92146000 | -0.58515100 | 0.00017300  |
| Cl | 3.28876100  | 0.06757400  | 0.00010600  |
| H  | -1.31238600 | 2.62245000  | 0.82942200  |

**COM1-2**

|    |             |             |             |
|----|-------------|-------------|-------------|
| C  | 2.06336700  | 0.04234400  | 0.54290200  |
| C  | 2.31588200  | -0.89070500 | -0.45389600 |
| C  | 3.51859600  | -1.58963800 | -0.49918700 |
| C  | 4.48814000  | -1.34738500 | 0.46865400  |
| C  | 4.25363500  | -0.41233200 | 1.46893400  |
| C  | 3.04377100  | 0.27745200  | 1.49914500  |
| H  | 1.12050200  | 0.58267300  | 0.56894600  |
| H  | 5.42443000  | -1.89245400 | 0.43184700  |
| H  | 5.00610800  | -0.21819600 | 2.22463900  |
| N  | 1.27052500  | -1.13199000 | -1.43668800 |
| H  | 1.00362400  | -0.24770600 | -1.88805500 |
| H  | 1.58196700  | -1.79613000 | -2.15095100 |
| H  | 0.34099600  | -1.51212400 | -0.91600600 |
| C  | -0.52734800 | 2.67843600  | 0.14979200  |
| C  | -0.75801800 | 1.98702900  | -1.03864300 |
| C  | 0.25309800  | 1.93953000  | -2.00886700 |
| C  | 1.48312100  | 2.54858500  | -1.77598200 |
| C  | 1.70818200  | 3.23091100  | -0.57843000 |
| C  | 0.69941400  | 3.30611700  | 0.37584600  |
| H  | -1.31229900 | 2.73944800  | 0.89854200  |
| H  | 0.06077800  | 1.45714400  | -2.96632800 |
| H  | 2.25800900  | 2.51476200  | -2.53562500 |
| H  | 2.66379400  | 3.71211800  | -0.39930700 |
| H  | 0.86525900  | 3.84698200  | 1.30124200  |
| C  | -2.08051400 | 1.29611600  | -1.27600600 |
| H  | -2.75394800 | 1.50082700  | -0.44220200 |
| C  | -2.75338400 | 1.63917300  | -2.58822800 |
| H  | -2.12769100 | 1.35237300  | -3.43609800 |
| H  | -3.70953900 | 1.12021400  | -2.67165400 |
| H  | -2.92633500 | 2.71620300  | -2.63417500 |
| O  | -1.80201500 | -0.15298900 | -1.32950900 |
| C  | -1.86850500 | -0.96798300 | -0.28830500 |
| C  | -3.12104000 | -0.92986600 | 0.62711100  |
| N  | -0.90509800 | -1.77628000 | -0.10459900 |
| H  | -1.05294100 | -2.46678500 | 0.62736200  |
| Cl | -3.39382900 | -2.52078000 | 1.36373600  |
| Cl | -2.77525000 | 0.25537500  | 1.91936000  |
| Cl | -4.55983300 | -0.46878800 | -0.28720400 |
| Cl | 3.80947000  | -2.75292000 | -1.75522000 |
| Cl | 2.74914900  | 1.44745200  | 2.73955500  |

**COMI-3**

|    |             |             |             |
|----|-------------|-------------|-------------|
| C  | 1.01896900  | -1.79345100 | 0.03279500  |
| C  | 0.09362100  | -2.05585100 | -0.97891200 |
| C  | -1.08435300 | -2.73639400 | -0.64633200 |
| C  | -1.32775300 | -3.17300500 | 0.64857100  |
| C  | -0.40767600 | -2.90516800 | 1.65550600  |
| C  | 0.75292600  | -2.21134500 | 1.33209100  |
| H  | 1.94780200  | -1.28132100 | -0.19833000 |
| H  | -2.24109100 | -3.71542500 | 0.86589100  |
| H  | -0.58632100 | -3.23145300 | 2.67298100  |
| N  | 0.27301500  | -1.54144100 | -2.28488900 |
| H  | 1.21611500  | -1.18715400 | -2.41787900 |
| H  | 0.05534400  | -2.22474500 | -3.00616500 |
| H  | -1.17170000 | -0.26805700 | -2.19444900 |
| C  | 2.79139400  | 1.16474800  | 0.70408300  |
| C  | 2.15764400  | 1.48205900  | -0.49431300 |
| C  | 2.66616500  | 0.99171500  | -1.70321500 |
| C  | 3.79600300  | 0.18083900  | -1.70451300 |
| C  | 4.43366000  | -0.13003800 | -0.50068800 |
| C  | 3.93553600  | 0.36590700  | 0.69959000  |
| H  | 2.39567200  | 1.53784800  | 1.64524000  |
| H  | 2.17748400  | 1.24671600  | -2.64073700 |
| H  | 4.19406600  | -0.19349100 | -2.64221300 |
| H  | 5.32054100  | -0.75438000 | -0.50311000 |
| H  | 4.42653400  | 0.12404200  | 1.63577800  |
| C  | 0.94692300  | 2.37373600  | -0.48858700 |
| H  | 0.61966800  | 2.56369800  | 0.53250700  |
| C  | 1.10168600  | 3.65987500  | -1.27055800 |
| H  | 1.37165000  | 3.45130700  | -2.30775200 |
| H  | 0.18342200  | 4.24925000  | -1.24862100 |
| H  | 1.90742600  | 4.24099500  | -0.81673200 |
| O  | -0.12048100 | 1.59450100  | -1.19655700 |
| C  | -1.23367000 | 1.12134800  | -0.77127200 |
| C  | -1.88414100 | 1.56835800  | 0.55278000  |
| N  | -1.78949300 | 0.20983000  | -1.50448600 |
| H  | -2.68880200 | -0.19406200 | -1.26782500 |
| Cl | -3.54077100 | 0.95774600  | 0.69353900  |
| Cl | -0.87807600 | 0.85224700  | 1.83302200  |
| Cl | -1.91002700 | 3.33378900  | 0.63182400  |
| Cl | -2.27395000 | -3.02488100 | -1.89215200 |
| Cl | 1.89163500  | -1.83763600 | 2.59184600  |

**COM2-1**

|   |             |             |             |
|---|-------------|-------------|-------------|
| C | 3.49413200  | 0.00337200  | 1.55570400  |
| C | 3.61172800  | -0.54380000 | 0.09887600  |
| C | 5.30660400  | 0.97013600  | 0.28633000  |
| C | 4.69819500  | 0.97310000  | 1.69908900  |
| H | 2.52910000  | 0.48426900  | 1.71341700  |
| H | 3.54816300  | -0.83117000 | 2.26159300  |
| H | 4.38681300  | 1.97647300  | 2.00052400  |
| H | 5.41573900  | 0.62005700  | 2.44345700  |
| C | 5.16024100  | -0.51952200 | -0.14030100 |
| C | 3.20762500  | 0.62648800  | -0.78784600 |
| C | 4.30173300  | 1.68678400  | -0.63240600 |
| H | 4.70180600  | 1.93460200  | -1.61942500 |
| H | 3.89050600  | 2.60540700  | -0.20291200 |
| H | 6.32653300  | 1.35936100  | 0.22673300  |
| C | 5.93913700  | -1.49145800 | 0.74672100  |
| H | 5.64406000  | -1.45436300 | 1.79672000  |
| H | 5.80445100  | -2.52047400 | 0.39885800  |
| H | 7.00945100  | -1.26554700 | 0.69071800  |
| C | 5.55604600  | -0.78314800 | -1.59731100 |
| H | 6.61241000  | -0.53839100 | -1.74794800 |
| H | 5.42790200  | -1.84147400 | -1.84502000 |
| H | 4.97105500  | -0.20804900 | -2.32020500 |
| C | 2.92644500  | -1.86233000 | -0.19118200 |
| H | 3.09780400  | -2.19435200 | -1.21915200 |
| H | 3.28452400  | -2.63590900 | 0.49415500  |
| S | 1.12854400  | -1.89116500 | 0.02662500  |
| O | 0.80109600  | -3.20075700 | 0.56076700  |
| O | 0.72119800  | -0.70410100 | 0.77719500  |
| O | 0.57980300  | -1.80838100 | -1.43980500 |
| H | 0.16224900  | -0.87607000 | -1.63750800 |
| O | 2.24729900  | 0.68778400  | -1.51696700 |
| C | -5.40975000 | -0.37415400 | 0.92274200  |
| C | -4.28403500 | -0.88329100 | 0.27870600  |
| C | -4.44249700 | -1.75758800 | -0.79773600 |
| C | -5.71734100 | -2.11505500 | -1.22261500 |
| C | -6.84125800 | -1.60867500 | -0.57258400 |
| C | -6.68632200 | -0.73825700 | 0.50176500  |
| H | -5.28667900 | 0.31473100  | 1.75534400  |
| H | -3.56245400 | -2.14320500 | -1.30410800 |
| H | -5.83465500 | -2.79221300 | -2.06262900 |
| H | -7.83501900 | -1.89008200 | -0.90576600 |
| H | -7.55790000 | -0.33526800 | 1.00761500  |
| C | -2.90536700 | -0.53183100 | 0.78446600  |



|    |             |             |             |
|----|-------------|-------------|-------------|
| H  | -2.96725400 | 0.37969600  | 1.37774000  |
| C  | -2.26956500 | -1.64077900 | 1.60689800  |
| H  | -2.13819400 | -2.53474600 | 0.99129400  |
| H  | -1.28908700 | -1.32818400 | 1.97120700  |
| H  | -2.92357000 | -1.88475800 | 2.44810200  |
| O  | -2.05618800 | -0.33931400 | -0.37640300 |
| C  | -1.33321600 | 0.70391000  | -0.74390800 |
| C  | -1.54966800 | 2.06657800  | -0.03799800 |
| N  | -0.49966800 | 0.52311400  | -1.67847100 |
| H  | 0.06444000  | 1.32639900  | -1.93117800 |
| Cl | -0.61727400 | 3.35707300  | -0.83537200 |
| Cl | -3.27573000 | 2.50316400  | -0.10832300 |
| Cl | -0.98723600 | 1.94596200  | 1.64716000  |

**pR2**

|    |             |             |             |
|----|-------------|-------------|-------------|
| C  | 2.42537700  | -0.78820300 | 0.99881800  |
| C  | 2.04717600  | 0.31085000  | 0.22784100  |
| C  | 2.84427700  | 0.71862500  | -0.84553700 |
| C  | 4.00690700  | 0.02117500  | -1.14825900 |
| C  | 4.38636000  | -1.07358900 | -0.37172000 |
| C  | 3.59997800  | -1.47486000 | 0.70371600  |
| H  | 1.81002200  | -1.09995200 | 1.83902500  |
| H  | 2.55492300  | 1.57645000  | -1.44685900 |
| H  | 4.62263500  | 0.33423100  | -1.98438300 |
| H  | 5.29841400  | -1.61173300 | -0.60631000 |
| H  | 3.89685900  | -2.32310900 | 1.31051800  |
| C  | 0.81078200  | 1.07315900  | 0.59826000  |
| C  | 1.01275800  | 2.52467200  | 0.96485400  |
| H  | 0.24269300  | 0.54601500  | 1.36263200  |
| H  | 0.06090000  | 3.01285400  | 1.18507800  |
| H  | 1.64279200  | 2.56024600  | 1.85648800  |
| H  | 1.52462200  | 3.06129400  | 0.16373100  |
| O  | -0.04860600 | 1.12447300  | -0.66142700 |
| C  | -1.12673800 | 0.52618700  | -0.96734000 |
| C  | -1.96214500 | -0.29217100 | 0.04278200  |
| Cl | -0.97061800 | -1.67421000 | 0.52953400  |
| Cl | -2.34876300 | 0.77679100  | 1.40140200  |
| Cl | -3.47038600 | -0.87524000 | -0.68462500 |
| N  | -1.53445700 | 0.63318200  | -2.20291500 |
| H  | -0.96360900 | 1.15818400  | -2.85753500 |
| H  | -2.40255900 | 0.21761100  | -2.51835600 |

**TS-AI (S<sub>N</sub>1)**Value of imaginary frequency = -180.4 cm<sup>-1</sup>

|    |             |             |             |
|----|-------------|-------------|-------------|
| C  | -2.43534300 | -0.91470700 | -0.87830000 |
| C  | -2.27908900 | 0.35981600  | -0.29183200 |
| C  | -3.26332000 | 0.84692300  | 0.59529500  |
| C  | -4.37727100 | 0.07804100  | 0.87567300  |
| C  | -4.52413300 | -1.17772800 | 0.27579700  |
| C  | -3.55886600 | -1.67500000 | -0.60181200 |
| H  | -1.67749900 | -1.28274700 | -1.56367900 |
| H  | -3.14691000 | 1.81842000  | 1.06282800  |
| H  | -5.13626900 | 0.44585200  | 1.55650700  |
| H  | -5.40335400 | -1.77433100 | 0.49768300  |
| H  | -3.68911100 | -2.64758900 | -1.06217400 |
| C  | -1.13877700 | 1.13673700  | -0.65177900 |
| H  | -0.46619500 | 0.68382300  | -1.37753400 |
| C  | -1.04631000 | 2.60421700  | -0.50140500 |
| H  | -1.46106600 | 2.96084300  | 0.44076000  |
| H  | -0.01882600 | 2.94710300  | -0.61106200 |
| H  | -1.64051200 | 3.03437600  | -1.32032700 |
| O  | 0.11049400  | 0.74016200  | 0.95005400  |
| C  | 1.19802200  | 0.19164000  | 1.14869100  |
| C  | 2.09942600  | -0.20943600 | -0.05490400 |
| N  | 1.63239900  | -0.10227700 | 2.36430700  |
| H  | 2.53360100  | -0.52334900 | 2.53697000  |
| Cl | 3.70455400  | -0.77827100 | 0.42719400  |
| Cl | 1.24141900  | -1.51630000 | -0.90747300 |
| Cl | 2.27243300  | 1.20954200  | -1.10497900 |
| H  | 1.03646000  | 0.13471000  | 3.14630200  |

**IM-AI**

|   |             |             |             |
|---|-------------|-------------|-------------|
| C | 0.50921800  | -1.31190900 | 0.00007600  |
| C | -0.44823900 | -0.24849600 | 0.00012800  |
| C | 0.00822300  | 1.10703800  | 0.00012200  |
| C | 1.35726800  | 1.37200300  | -0.00003300 |
| C | 2.27402600  | 0.30626100  | -0.00010000 |
| C | 1.85737600  | -1.03207800 | 0.00000400  |
| H | 0.15642100  | -2.33951400 | 0.00009700  |
| H | -0.70505800 | 1.92352600  | 0.00026700  |
| H | 1.71794100  | 2.39390100  | -0.00009200 |
| H | 3.33752100  | 0.52774700  | -0.00024100 |
| H | 2.58924400  | -1.83133300 | 0.00000200  |
| C | -1.79402800 | -0.58451600 | -0.00011700 |
| H | -2.02365100 | -1.65155200 | -0.00020700 |
| C | -2.95932000 | 0.30686800  | -0.00007400 |
| H | -2.73247400 | 1.36998000  | -0.00007900 |
| H | -3.58377300 | 0.05810900  | -0.86946900 |
| H | -3.58331300 | 0.05811100  | 0.86968900  |

**IM-AII**

|    |             |             |             |
|----|-------------|-------------|-------------|
| C  | 0.17470100  | 1.15080600  | -1.29201400 |
| C  | 0.52362500  | 1.09371400  | 0.06251000  |
| C  | 1.48137300  | 1.97606700  | 0.55837700  |
| C  | 2.08255900  | 2.90542300  | -0.28959600 |
| C  | 1.72146500  | 2.96572300  | -1.63044800 |
| C  | 0.76262500  | 2.08530600  | -2.13295400 |
| H  | -0.55820400 | 0.45926600  | -1.70377900 |
| H  | 1.77696600  | 1.94468700  | 1.60190400  |
| H  | 2.83088100  | 3.58331900  | 0.10682900  |
| H  | 2.18342900  | 3.69574700  | -2.28663000 |
| H  | 0.47811700  | 2.12643600  | -3.17900100 |
| C  | -0.12292100 | 0.05809300  | 0.94672700  |
| H  | 0.05181400  | -0.95652400 | 0.57747100  |
| O  | -1.60639700 | 0.29611100  | 0.87330400  |
| C  | -2.41204400 | -0.40570100 | 0.18996200  |
| C  | -3.86218800 | 0.12716600  | 0.20259600  |
| N  | -2.10670900 | -1.43710600 | -0.54638100 |
| H  | -2.84693900 | -1.93558200 | -1.02902600 |
| Cl | -5.00711600 | -1.14620700 | -0.26268500 |
| Cl | -4.26225900 | 0.74319700  | 1.79884000  |
| Cl | -3.85397200 | 1.42549000  | -1.00968900 |
| H  | -1.14568900 | -1.75177000 | -0.68893600 |
| C  | 2.19535000  | -1.65133400 | -0.89799200 |
| C  | 2.41877100  | -1.90169000 | 0.46059500  |
| C  | 3.39500300  | -1.13110900 | 1.10455800  |
| C  | 4.09926900  | -0.16549500 | 0.39825400  |
| C  | 3.88751700  | 0.04980200  | -0.96103600 |
| C  | 2.92416900  | -0.70930100 | -1.60995300 |
| H  | 3.60466600  | -1.29294100 | 2.15760600  |
| H  | 4.45358800  | 0.80447500  | -1.49278200 |
| H  | 2.71909400  | -0.55766900 | -2.66373300 |
| N  | 1.61351100  | -2.79483000 | 1.17132300  |
| H  | 1.36868200  | -3.62773800 | 0.64784800  |
| H  | 1.99868500  | -3.04701000 | 2.07328100  |
| C  | 0.19784000  | 0.10310500  | 2.42150700  |
| H  | -0.04569900 | 1.07895300  | 2.84599800  |
| H  | -0.35532900 | -0.67413300 | 2.95067100  |
| H  | 1.26603500  | -0.08759700 | 2.54734500  |
| Cl | 0.91037600  | -2.53172400 | -1.71265200 |
| Cl | 5.25537000  | 0.81449700  | 1.24426500  |

**TS-AII (S<sub>N</sub>2)**Value of imaginary frequency = -231.5 cm<sup>-1</sup>

|    |             |             |             |
|----|-------------|-------------|-------------|
| C  | 0.56244900  | -2.07995000 | -0.40711100 |
| C  | 0.22370200  | -0.78592400 | 0.03952600  |
| C  | 0.38989100  | 0.31772000  | -0.81946200 |
| C  | 0.89139300  | 0.12625600  | -2.09834000 |
| C  | 1.21118800  | -1.16160700 | -2.53246000 |
| C  | 1.04527200  | -2.26747800 | -1.69237200 |
| H  | 0.45610800  | -2.92312500 | 0.27144000  |
| H  | 0.14304800  | 1.31866400  | -0.47982000 |
| H  | 1.03859800  | 0.97539700  | -2.75654100 |
| H  | 1.60259500  | -1.30625200 | -3.53468700 |
| H  | 1.31984400  | -3.25944200 | -2.03373900 |
| C  | -0.28950000 | -0.63056700 | 1.36775500  |
| H  | -0.24371300 | -1.50382300 | 2.00877400  |
| O  | -2.29970000 | -1.01559900 | 1.13245900  |
| C  | -2.90576400 | -0.85098700 | 0.07017800  |
| C  | -4.01673300 | 0.23814400  | 0.00748500  |
| N  | -2.62766700 | -1.47223400 | -1.06676600 |
| H  | -3.17048500 | -1.31627800 | -1.90490400 |
| Cl | -5.30515700 | -0.20145900 | -1.12896400 |
| Cl | -4.67649500 | 0.51831100  | 1.60725800  |
| Cl | -3.16642700 | 1.70237900  | -0.58247900 |
| H  | -1.86677700 | -2.13820300 | -1.08950000 |
| C  | 3.61940000  | -0.88667300 | 0.30840700  |
| C  | 3.03404400  | -0.06886800 | 1.28662100  |
| C  | 2.99312800  | 1.31020300  | 1.05023000  |
| C  | 3.50290700  | 1.83241400  | -0.13283800 |
| C  | 4.07941700  | 1.01653900  | -1.09927900 |
| C  | 4.13989400  | -0.35270100 | -0.86171200 |
| H  | 2.58749300  | 1.98227200  | 1.80088000  |
| H  | 4.48672200  | 1.44404000  | -2.00749200 |
| H  | 4.60192100  | -1.01676500 | -1.58441400 |
| N  | 2.41923900  | -0.61520700 | 2.41666000  |
| H  | 2.78801000  | -1.52586200 | 2.66989100  |
| H  | 2.43703100  | 0.00468700  | 3.21887600  |
| C  | -0.52058900 | 0.68418800  | 2.01362100  |
| H  | -1.09955300 | 1.35139200  | 1.37229600  |
| H  | -1.02841800 | 0.56910200  | 2.96944900  |
| H  | 0.46014900  | 1.14680300  | 2.17331300  |
| Cl | 3.72501900  | -2.60568100 | 0.59195600  |
| Cl | 3.39855500  | 3.54468500  | -0.40566900 |

**IM1**

|    |             |             |             |
|----|-------------|-------------|-------------|
| C  | 3.21687900  | 0.66653100  | -0.33991900 |
| C  | 1.93464800  | 1.00648800  | 0.09793600  |
| C  | 1.46937700  | 0.51707800  | 1.32237100  |
| C  | 2.27708400  | -0.31624800 | 2.08866600  |
| C  | 3.55163200  | -0.65859400 | 1.64253200  |
| C  | 4.02502800  | -0.16300300 | 0.43015100  |
| H  | 3.59080700  | 1.05926200  | -1.28300000 |
| H  | 0.47738500  | 0.77524900  | 1.68263900  |
| H  | 1.91350600  | -0.69286700 | 3.03848000  |
| H  | 4.18042300  | -1.30411700 | 2.24628200  |
| H  | 5.02250600  | -0.41622600 | 0.08831000  |
| C  | 1.06709300  | 1.85839300  | -0.78610200 |
| H  | 1.68338200  | 2.32984000  | -1.55812600 |
| C  | -0.47941900 | -1.26419200 | -0.65444000 |
| C  | -0.79881900 | 0.06990000  | -0.90638500 |
| C  | -2.00333100 | 0.61656400  | -0.48108600 |
| C  | -2.88577500 | -0.18185900 | 0.23892500  |
| C  | -2.57101800 | -1.51048400 | 0.51927400  |
| C  | -1.37466900 | -2.04943800 | 0.06490700  |
| H  | -2.26512900 | 1.64559000  | -0.70602500 |
| H  | -3.26826700 | -2.12177100 | 1.08099300  |
| H  | -1.12863900 | -3.08681600 | 0.26105400  |
| N  | 0.14582800  | 0.91872000  | -1.63924000 |
| H  | 0.77054000  | 0.30417600  | -2.17864300 |
| H  | -0.36983200 | 1.49588700  | -2.31260500 |
| C  | 0.22355400  | 2.90943300  | -0.09041700 |
| H  | 0.90447800  | 3.60623900  | 0.40233800  |
| H  | -0.38300300 | 3.48028500  | -0.80041900 |
| H  | -0.42651600 | 2.48326700  | 0.67473900  |
| Cl | 0.99007700  | -1.95780200 | -1.25336100 |
| Cl | -4.38043200 | 0.48765800  | 0.78043100  |

**IM2**

|    |             |             |             |
|----|-------------|-------------|-------------|
| C  | 4.65286000  | -2.65723100 | -0.58759500 |
| C  | 4.24922000  | -1.36411900 | -0.92308300 |
| C  | 5.05461700  | -0.28593400 | -0.54357100 |
| C  | 6.22857500  | -0.50094400 | 0.17109300  |
| C  | 6.61813500  | -1.79512300 | 0.50666100  |
| C  | 5.82992500  | -2.87550300 | 0.12122200  |
| H  | 4.03373600  | -3.50240000 | -0.87946100 |
| H  | 4.75763700  | 0.72976100  | -0.79046700 |
| H  | 6.84030500  | 0.34549100  | 0.46620300  |
| H  | 7.53501700  | -1.96082300 | 1.06300000  |
| H  | 6.12921100  | -3.88746800 | 0.37430000  |
| C  | 2.92267800  | -1.15340100 | -1.62489400 |
| H  | 2.58513600  | -2.12238600 | -2.00854500 |
| C  | 2.50241100  | 0.43293600  | 1.40142000  |
| C  | 2.04106800  | 0.44678500  | 0.08022000  |
| C  | 1.73090000  | 1.67314200  | -0.50962000 |
| C  | 1.93082700  | 2.85170100  | 0.19674300  |
| C  | 2.41272000  | 2.83806400  | 1.49963500  |
| C  | 2.68558700  | 1.61722200  | 2.10416500  |
| H  | 1.29978900  | 1.70003300  | -1.50448800 |
| H  | 2.55516900  | 3.76792000  | 2.03735500  |
| H  | 3.04326000  | 1.57657800  | 3.12649600  |
| N  | 1.83354300  | -0.75384900 | -0.67213600 |
| H  | 1.67188900  | -1.51620800 | -0.01334800 |
| H  | 0.47762600  | -0.55855700 | -1.37103000 |
| C  | 2.99319200  | -0.18293900 | -2.79757800 |
| H  | 3.69705400  | -0.56579100 | -3.53965500 |
| H  | 2.00984100  | -0.07579700 | -3.26459700 |
| H  | 3.33814800  | 0.80621800  | -2.48879000 |
| Cl | 2.83496200  | -1.07682100 | 2.19879200  |
| Cl | 1.54960300  | 4.37028900  | -0.56186600 |
| C  | -6.06865800 | -0.07900600 | 0.85557600  |
| C  | -6.26456300 | -1.57761100 | 0.58450400  |
| C  | -4.04914200 | -0.68135600 | -0.00455400 |
| C  | -3.75603900 | -0.42430100 | 1.50661700  |
| C  | -5.13214400 | 0.02351900  | 2.07415500  |
| H  | -6.49420100 | -2.16671100 | 1.47683500  |
| H  | -7.03475900 | -1.79308800 | -0.16170400 |
| H  | -6.99815600 | 0.48916300  | 0.94576300  |
| H  | -3.34946800 | -1.31612600 | 1.98989400  |
| H  | -3.00866700 | 0.36339100  | 1.61632300  |
| H  | -5.47228100 | -0.61562300 | 2.89335900  |
| H  | -5.08396400 | 1.04459900  | 2.45821900  |



|   |             |             |             |
|---|-------------|-------------|-------------|
| C | -2.87478200 | -0.85237300 | -0.95446400 |
| H | -2.60468100 | -1.91105700 | -1.02344800 |
| H | -3.10790100 | -0.48792700 | -1.95961300 |
| S | -1.37915500 | -0.00990700 | -0.46716700 |
| O | -1.63473900 | 1.41892900  | -0.36578700 |
| O | -0.78574200 | -0.69476600 | 0.68015600  |
| O | -0.47760800 | -0.30956700 | -1.73275600 |
| O | -4.54085000 | -3.05998700 | -0.33274000 |
| C | -4.89647600 | -1.96447300 | 0.02193300  |
| C | -5.15315300 | 0.37408600  | -0.32035600 |
| C | -5.78717500 | 0.17600400  | -1.70201200 |
| H | -6.71771000 | 0.74829100  | -1.77426000 |
| H | -5.11852400 | 0.54658300  | -2.48538900 |
| H | -6.01440900 | -0.86853800 | -1.93427100 |
| C | -4.70239500 | 1.83028200  | -0.20830400 |
| H | -5.57792000 | 2.48603400  | -0.27600800 |
| H | -4.17741000 | 2.05218700  | 0.72156800  |
| H | -4.01734300 | 2.08530800  | -1.02082400 |

**IM-BI1**

|    |             |             |             |
|----|-------------|-------------|-------------|
| C  | 1.60987200  | 0.33492800  | -1.11580600 |
| C  | 2.21346000  | 0.68635800  | 0.09484300  |
| C  | 3.60053600  | 0.84116900  | 0.14974500  |
| C  | 4.37114300  | 0.66460900  | -0.99340400 |
| C  | 3.76277100  | 0.33893500  | -2.20382700 |
| C  | 2.38359200  | 0.16623900  | -2.26130500 |
| H  | 0.53534100  | 0.17665400  | -1.16319800 |
| H  | 4.08667700  | 1.08788200  | 1.08834600  |
| H  | 5.44953500  | 0.77324300  | -0.93742000 |
| H  | 4.36562600  | 0.19208600  | -3.09453600 |
| H  | 1.90833900  | -0.11341800 | -3.19664100 |
| C  | 1.34296300  | 0.98564300  | 1.29062800  |
| H  | 0.41037100  | 0.42560000  | 1.22977500  |
| O  | 1.02093900  | 2.43006500  | 1.21842300  |
| C  | 0.09268500  | 2.84957300  | 0.39554700  |
| C  | 0.44750000  | 4.26787700  | -0.11307300 |
| N  | -0.92756600 | 2.18578100  | 0.02865500  |
| H  | -1.51939300 | 2.67994300  | -0.63314500 |
| Cl | 0.77493300  | 5.32508600  | 1.27212600  |
| Cl | 1.89515500  | 4.09358500  | -1.12531500 |
| Cl | -0.87679000 | 4.96488300  | -1.07646500 |
| H  | -1.50120600 | 0.93302400  | 0.61894600  |
| C  | 3.90666700  | -2.82103000 | -1.14819900 |
| C  | 2.72054100  | -2.76583500 | -0.39494400 |
| C  | 2.84802700  | -2.55164000 | 0.98984900  |
| C  | 4.10344200  | -2.41144200 | 1.55652400  |
| C  | 5.27220000  | -2.45827000 | 0.80391100  |
| C  | 5.15431500  | -2.66824600 | -0.56520100 |
| H  | 1.94898000  | -2.50999000 | 1.59761700  |
| H  | 6.24002600  | -2.34372900 | 1.27525000  |
| H  | 6.03805500  | -2.71507800 | -1.19244200 |
| N  | 1.48877200  | -2.96448400 | -0.96063400 |
| H  | 1.41471600  | -2.76037300 | -1.94624300 |
| H  | 0.69715400  | -2.66064000 | -0.40590900 |
| C  | 1.96155800  | 0.78876100  | 2.65507200  |
| H  | 2.30731600  | -0.24224200 | 2.75071500  |
| H  | 2.80990200  | 1.45968400  | 2.80462300  |
| H  | 1.22081900  | 0.98909100  | 3.43120800  |
| Cl | 3.79503900  | -3.09392700 | -2.87215800 |
| Cl | 4.22736800  | -2.15989600 | 3.28555200  |
| C  | -6.36205100 | -0.41918900 | -0.47008100 |
| C  | -6.86998900 | -1.84715600 | -0.24205700 |
| C  | -4.52849800 | -1.43890100 | 0.40495200  |

|   |             |             |             |
|---|-------------|-------------|-------------|
| C | -5.02190900 | -0.50405100 | 1.54741500  |
| C | -6.23627100 | 0.23649300  | 0.92007200  |
| H | -7.70983600 | -1.91816800 | 0.45487200  |
| H | -7.15737100 | -2.36555900 | -1.16099100 |
| H | -6.94500200 | 0.15778700  | -1.19271000 |
| H | -5.29246900 | -1.08663000 | 2.43361300  |
| H | -4.22338700 | 0.18057800  | 1.83735500  |
| H | -7.14995600 | 0.10977900  | 1.50655100  |
| H | -6.04783800 | 1.30915100  | 0.83960800  |
| C | -3.20058500 | -2.14304700 | 0.63781400  |
| H | -3.13104700 | -2.49071000 | 1.67246700  |
| H | -3.10341200 | -3.02657800 | -0.00224300 |
| S | -1.69780400 | -1.23694800 | 0.33551200  |
| O | -1.54120800 | -0.97674400 | -1.09541500 |
| O | -1.96875500 | 0.11005100  | 1.09373000  |
| O | -0.60224500 | -1.95298300 | 0.98728500  |
| O | -5.50702300 | -3.66188600 | 0.68833600  |
| C | -5.62705500 | -2.51434200 | 0.34157900  |
| C | -4.87102500 | -0.62053000 | -0.88442300 |
| C | -4.67659400 | -1.42641400 | -2.17229500 |
| H | -5.13617400 | -0.90272400 | -3.01709200 |
| H | -3.60823700 | -1.53383800 | -2.38160900 |
| H | -5.11070200 | -2.42957800 | -2.12443700 |
| C | -4.16992800 | 0.73524300  | -1.05130400 |
| H | -4.76693700 | 1.35446800  | -1.73090300 |
| H | -4.05925400 | 1.27834000  | -0.10969500 |
| H | -3.17905800 | 0.60617500  | -1.49073800 |

**TS-BI1 (S<sub>N</sub>1)**Value of imaginary frequency = -80.9 cm<sup>-1</sup>

|    |             |             |             |
|----|-------------|-------------|-------------|
| C  | 1.53548700  | 0.26821600  | -1.06340300 |
| C  | 2.23877000  | 0.38890200  | 0.16076800  |
| C  | 3.60364800  | 0.75604800  | 0.15564700  |
| C  | 4.24475000  | 0.99826800  | -1.04479800 |
| C  | 3.53823700  | 0.87769600  | -2.24626700 |
| C  | 2.19096600  | 0.51518700  | -2.25790000 |
| H  | 0.49211900  | -0.04208900 | -1.06433300 |
| H  | 4.14744800  | 0.84739200  | 1.08883000  |
| H  | 5.29296800  | 1.27522500  | -1.05690000 |
| H  | 4.05132800  | 1.05642500  | -3.18629900 |
| H  | 1.66223800  | 0.41136700  | -3.19879800 |
| C  | 1.52123400  | 0.15317200  | 1.36025300  |
| H  | 0.47823000  | -0.14763700 | 1.26799300  |
| O  | 0.75440500  | 2.31211000  | 1.62538500  |
| C  | 0.14295900  | 2.82336800  | 0.69255600  |
| C  | 0.66237300  | 4.20742100  | 0.18266300  |
| N  | -0.84523100 | 2.26323400  | 0.01321600  |
| H  | -1.31062100 | 2.74987700  | -0.73729800 |
| Cl | 1.20073700  | 5.18045600  | 1.55268500  |
| Cl | 2.04468600  | 3.82473200  | -0.88035900 |
| Cl | -0.56360400 | 5.11433000  | -0.74079200 |
| H  | -1.20464500 | 1.33800700  | 0.33168000  |
| C  | 3.67364500  | -2.55182200 | -1.28263100 |
| C  | 2.44771700  | -2.79781900 | -0.63128000 |
| C  | 2.48058500  | -2.91017100 | 0.77657600  |
| C  | 3.68331000  | -2.78076700 | 1.45183900  |
| C  | 4.88365900  | -2.50220900 | 0.80551300  |
| C  | 4.85892100  | -2.39719000 | -0.58190100 |
| H  | 1.55364100  | -3.11528600 | 1.30300100  |
| H  | 5.80703400  | -2.40804500 | 1.36251200  |
| H  | 5.77274000  | -2.20393300 | -1.13376900 |
| N  | 1.27830700  | -2.94783800 | -1.30536500 |
| H  | 1.23892800  | -2.65278100 | -2.26796300 |
| H  | 0.42169100  | -2.86494300 | -0.76413200 |
| C  | 2.06417400  | 0.09424400  | 2.72225800  |
| H  | 2.00526000  | -0.95757400 | 3.03438800  |
| H  | 3.09015300  | 0.44090900  | 2.82720100  |
| H  | 1.39783400  | 0.65406900  | 3.38216400  |
| Cl | 3.69873600  | -2.47331900 | -3.03010500 |
| Cl | 3.70115000  | -2.99522900 | 3.18976300  |
| C  | -6.15768600 | 0.05007900  | -0.45036300 |
| C  | -6.85086300 | -1.30937300 | -0.30869700 |

|   |             |             |             |
|---|-------------|-------------|-------------|
| C | -4.46131300 | -1.27080400 | 0.29600100  |
| C | -4.79075300 | -0.35770200 | 1.51220300  |
| C | -5.91537100 | 0.57581700  | 0.98022300  |
| H | -7.68406300 | -1.31686200 | 0.39969100  |
| H | -7.21599800 | -1.71706800 | -1.25556100 |
| H | -6.67120000 | 0.75321900  | -1.11167100 |
| H | -5.10770700 | -0.95608600 | 2.37206900  |
| H | -3.89329800 | 0.18995900  | 1.80520900  |
| H | -6.82472900 | 0.51966900  | 1.58454100  |
| H | -5.59520500 | 1.62003800  | 0.97374000  |
| C | -3.22927500 | -2.15037500 | 0.42421400  |
| H | -3.21399000 | -2.62228400 | 1.41046400  |
| H | -3.24170100 | -2.95488900 | -0.31716500 |
| S | -1.63159000 | -1.37082300 | 0.23315100  |
| O | -1.42772400 | -1.10663900 | -1.21060300 |
| O | -1.66952100 | -0.10822200 | 1.03916700  |
| O | -0.64055700 | -2.32642700 | 0.78125200  |
| O | -5.74309100 | -3.34750500 | 0.48335400  |
| C | -5.69973100 | -2.17621700 | 0.20151900  |
| C | -4.71737700 | -0.32214100 | -0.91981100 |
| C | -4.65057600 | -1.05502300 | -2.26273400 |
| H | -5.03218200 | -0.41440600 | -3.06503500 |
| H | -3.60811000 | -1.30009600 | -2.48702500 |
| H | -5.22398000 | -1.98681500 | -2.27593000 |
| C | -3.83526100 | 0.92995100  | -1.01355200 |
| H | -4.33497500 | 1.66106100  | -1.66075700 |
| H | -3.65677200 | 1.39808500  | -0.04304000 |
| H | -2.86899500 | 0.67731400  | -1.45526600 |

**IM-BI2**

|    |             |             |             |
|----|-------------|-------------|-------------|
| C  | 1.50358400  | 0.25764400  | -1.09788600 |
| C  | 2.27825300  | 0.34415900  | 0.08855700  |
| C  | 3.62633200  | 0.77152600  | 0.02052900  |
| C  | 4.17845200  | 1.10734600  | -1.20095400 |
| C  | 3.40380000  | 1.01089400  | -2.36259100 |
| C  | 2.07370900  | 0.59052000  | -2.31389800 |
| H  | 0.47194300  | -0.08788500 | -1.05011900 |
| H  | 4.22171800  | 0.83792700  | 0.92395700  |
| H  | 5.20978300  | 1.43638200  | -1.26215900 |
| H  | 3.85018500  | 1.25967700  | -3.32099000 |
| H  | 1.49176800  | 0.51437200  | -3.22560300 |
| C  | 1.65510000  | -0.00729800 | 1.30383500  |
| H  | 0.60797200  | -0.31171900 | 1.25633200  |
| O  | 0.72474500  | 2.29944200  | 1.67118500  |
| C  | 0.12485100  | 2.82247400  | 0.74572100  |
| C  | 0.64322300  | 4.21214400  | 0.24383200  |
| N  | -0.86309400 | 2.27053000  | 0.05056400  |
| H  | -1.33746600 | 2.76648000  | -0.68730000 |
| Cl | 1.28116700  | 5.13668600  | 1.60517400  |
| Cl | 1.95732700  | 3.83370700  | -0.90638500 |
| Cl | -0.61347700 | 5.16740200  | -0.58380300 |
| H  | -1.19934000 | 1.33530300  | 0.34687400  |
| C  | 3.63113500  | -2.51580100 | -1.27728200 |
| C  | 2.41500800  | -2.81318300 | -0.62782300 |
| C  | 2.45233700  | -2.93785700 | 0.78030700  |
| C  | 3.65410600  | -2.78245100 | 1.45659200  |
| C  | 4.83880800  | -2.44105400 | 0.81346300  |
| C  | 4.80722500  | -2.31777200 | -0.57411800 |
| H  | 1.53498300  | -3.18542500 | 1.30517000  |
| H  | 5.76043000  | -2.32251300 | 1.36893400  |
| H  | 5.71202200  | -2.07923300 | -1.12332300 |
| N  | 1.25280800  | -2.98940200 | -1.30204400 |
| H  | 1.20167000  | -2.69415200 | -2.26403800 |
| H  | 0.39259800  | -2.95046800 | -0.76074200 |
| C  | 2.25172000  | -0.00518100 | 2.64417900  |
| H  | 1.93864700  | -0.90702200 | 3.17798200  |
| H  | 3.33661300  | 0.08403300  | 2.66487400  |
| H  | 1.79457700  | 0.84506100  | 3.16711900  |
| Cl | 3.65365900  | -2.42024000 | -3.02353700 |
| Cl | 3.68726500  | -3.04465800 | 3.18576900  |
| C  | -6.09515500 | 0.10886900  | -0.45238600 |
| C  | -6.82700200 | -1.22990100 | -0.31155000 |
| C  | -4.43893700 | -1.25914500 | 0.29932300  |

|   |             |             |             |
|---|-------------|-------------|-------------|
| C | -4.74251500 | -0.33335100 | 1.51225300  |
| C | -5.84227000 | 0.62841100  | 0.97865900  |
| H | -7.66280600 | -1.21246100 | 0.39370100  |
| H | -7.19998900 | -1.62847000 | -1.25933500 |
| H | -6.58672200 | 0.82587400  | -1.11578100 |
| H | -5.07357300 | -0.91956600 | 2.37527900  |
| H | -3.82948900 | 0.19064600  | 1.80213200  |
| H | -6.75385400 | 0.59460800  | 1.58135300  |
| H | -5.49702400 | 1.66466100  | 0.97388800  |
| C | -3.23293100 | -2.17225000 | 0.43277000  |
| H | -3.23171500 | -2.63883700 | 1.42186900  |
| H | -3.26998700 | -2.98065900 | -0.30372500 |
| S | -1.61041900 | -1.44698900 | 0.23667000  |
| O | -1.40123000 | -1.20273500 | -1.21070500 |
| O | -1.59466800 | -0.18206000 | 1.03411700  |
| O | -0.65754000 | -2.44173500 | 0.78503400  |
| O | -5.78108000 | -3.29710800 | 0.48857300  |
| C | -5.70289000 | -2.12826400 | 0.20421000  |
| C | -4.66532600 | -0.30552100 | -0.91852300 |
| C | -4.61821300 | -1.04197600 | -2.25978800 |
| H | -4.98168700 | -0.39218300 | -3.06331700 |
| H | -3.58278200 | -1.31674300 | -2.48278100 |
| H | -5.21774300 | -1.95739800 | -2.27154300 |
| C | -3.74581200 | 0.91804800  | -1.01113200 |
| H | -4.21657800 | 1.65937100  | -1.66879000 |
| H | -3.56552300 | 1.38750100  | -0.04156700 |
| H | -2.78226700 | 0.63487600  | -1.44081300 |

**IM-BI3**

|    |             |             |             |
|----|-------------|-------------|-------------|
| C  | -2.46774800 | 1.82112200  | 1.28184500  |
| C  | -2.71128600 | 0.87476100  | 0.28352500  |
| C  | -4.00804000 | 0.73210600  | -0.21864000 |
| C  | -5.04445900 | 1.51737400  | 0.27597600  |
| C  | -4.79401800 | 2.45949200  | 1.27081800  |
| C  | -3.50361800 | 2.61317600  | 1.76902600  |
| H  | -1.45728900 | 1.94801800  | 1.66429400  |
| H  | -4.21498800 | -0.00042100 | -0.99452300 |
| H  | -6.04796300 | 1.39631900  | -0.11946200 |
| H  | -5.60209700 | 3.07663700  | 1.65042300  |
| H  | -3.29829200 | 3.35489300  | 2.53449000  |
| C  | -1.57325500 | 0.00414700  | -0.20264400 |
| H  | -0.63125000 | 0.45612000  | 0.12807800  |
| C  | -3.75679200 | -2.24108400 | 1.24858500  |
| C  | -2.71308000 | -2.16939900 | 0.31940700  |
| C  | -2.77535500 | -2.96146800 | -0.82861500 |
| C  | -3.88262300 | -3.76647900 | -1.05587400 |
| C  | -4.92873700 | -3.82458500 | -0.14167400 |
| C  | -4.85284000 | -3.06595000 | 1.01930000  |
| H  | -1.94621500 | -2.95296100 | -1.52846300 |
| H  | -5.78301300 | -4.46365000 | -0.33144700 |
| H  | -5.64825300 | -3.10560800 | 1.75471000  |
| N  | -1.56106700 | -1.34067100 | 0.50345800  |
| H  | -1.42482500 | -1.14738900 | 1.49716900  |
| H  | -0.39125800 | -2.01721300 | 0.04934300  |
| C  | -1.53557900 | -0.17215800 | -1.71522400 |
| H  | -0.66275500 | -0.75632200 | -2.01964200 |
| H  | -2.43910500 | -0.65207600 | -2.09869700 |
| H  | -1.46320500 | 0.81792900  | -2.17144800 |
| Cl | -3.68934200 | -1.31792100 | 2.71979500  |
| Cl | -3.95030900 | -4.73167300 | -2.50043000 |
| C  | 6.24084200  | -0.35897800 | 0.39434700  |
| C  | 6.74320600  | -1.73362600 | 0.85082600  |
| C  | 4.42526100  | -1.67238700 | 0.02882800  |
| C  | 4.94275800  | -1.34648500 | -1.40096900 |
| C  | 6.15341900  | -0.40396900 | -1.14489200 |
| H  | 7.60438500  | -2.10676000 | 0.28908600  |
| H  | 6.99522900  | -1.77834500 | 1.91421300  |
| H  | 6.81049200  | 0.48529300  | 0.79137800  |
| H  | 5.22124700  | -2.26250500 | -1.93165700 |
| H  | 4.15195200  | -0.86016400 | -1.97509400 |
| H  | 7.07808800  | -0.78379200 | -1.58760700 |
| H  | 5.97519200  | 0.58920100  | -1.56223600 |



|    |             |             |             |
|----|-------------|-------------|-------------|
| C  | 3.09262400  | -2.39746500 | 0.11870000  |
| H  | 3.04058500  | -3.19587200 | -0.62707400 |
| H  | 2.94798700  | -2.85188200 | 1.10286100  |
| S  | 1.65950500  | -1.37607900 | -0.14009900 |
| O  | 1.34747900  | -0.62568400 | 1.07549300  |
| O  | 1.85298100  | -0.59224500 | -1.36930900 |
| O  | 0.54220100  | -2.44107200 | -0.36520500 |
| O  | 5.39417400  | -3.78317500 | 0.78748000  |
| C  | 5.51221800  | -2.59945700 | 0.59215500  |
| C  | 4.73874100  | -0.35635200 | 0.81680400  |
| C  | 4.50303000  | -0.49948400 | 2.32333700  |
| H  | 4.94210100  | 0.35088300  | 2.85537400  |
| H  | 3.42795600  | -0.50226300 | 2.52593100  |
| H  | 4.92760600  | -1.41606900 | 2.74485100  |
| C  | 4.03905800  | 0.92361300  | 0.33731700  |
| H  | 4.62576500  | 1.78591600  | 0.67493400  |
| H  | 3.95156300  | 0.98343300  | -0.74936000 |
| H  | 3.03706400  | 1.01982500  | 0.76256900  |
| C  | 0.57006400  | 2.81772600  | -0.29928100 |
| N  | 0.96355800  | 2.16679100  | -1.40378200 |
| H  | 0.80938300  | 2.54743700  | -2.32390100 |
| O  | 0.70913200  | 2.42880000  | 0.83865200  |
| C  | -0.14357400 | 4.18871500  | -0.58683800 |
| Cl | -1.58197700 | 3.89167600  | -1.60667800 |
| Cl | -0.63125000 | 4.95055500  | 0.92208400  |
| Cl | 0.98941000  | 5.25702300  | -1.46529900 |
| H  | 1.38432900  | 1.24115600  | -1.31005300 |

**IM-BI4**

|    |             |             |             |
|----|-------------|-------------|-------------|
| C  | -2.10520400 | 3.16760600  | -0.41397000 |
| C  | -2.54210700 | 1.92751800  | -0.88374300 |
| C  | -3.90353600 | 1.74194400  | -1.13966700 |
| C  | -4.80901500 | 2.77491000  | -0.91695100 |
| C  | -4.36362300 | 4.00702000  | -0.44491600 |
| C  | -3.00785300 | 4.20381500  | -0.19715400 |
| H  | -1.04671800 | 3.31410600  | -0.21103200 |
| H  | -4.26390100 | 0.78297000  | -1.50274300 |
| H  | -5.86457300 | 2.61723300  | -1.11425000 |
| H  | -5.07171200 | 4.81161300  | -0.27458500 |
| H  | -2.65284400 | 5.16302700  | 0.16562900  |
| C  | -1.54011000 | 0.80362200  | -1.04043700 |
| H  | -0.53611000 | 1.23865600  | -1.01591700 |
| C  | -3.66314800 | -0.30199000 | 1.44577100  |
| C  | -2.78247300 | -0.76255800 | 0.45920500  |
| C  | -3.11518300 | -1.92172300 | -0.24518300 |
| C  | -4.31879100 | -2.56672400 | 0.00379400  |
| C  | -5.19917000 | -2.09884500 | 0.97315400  |
| C  | -4.85682600 | -0.96741700 | 1.70226200  |
| H  | -2.41848800 | -2.31936500 | -0.97510600 |
| H  | -6.13171200 | -2.61771300 | 1.16042700  |
| H  | -5.51975100 | -0.58807300 | 2.47132500  |
| N  | -1.54857900 | -0.11287100 | 0.16211500  |
| H  | -1.24593000 | 0.44688500  | 0.96111500  |
| H  | -0.35767800 | -1.05214900 | -0.05056700 |
| C  | -1.67504900 | 0.01756200  | -2.33719100 |
| H  | -2.65607600 | -0.45235300 | -2.44180900 |
| H  | -1.54194900 | 0.70424900  | -3.17584700 |
| H  | -0.89761000 | -0.74922600 | -2.39806200 |
| Cl | -3.27070700 | 1.10825800  | 2.38385900  |
| Cl | -4.72015800 | -3.99713300 | -0.90091200 |
| C  | 6.21886700  | 0.78089400  | 0.06291100  |
| C  | 6.72279500  | -0.45874800 | 0.81081800  |
| C  | 4.41333700  | -0.59219800 | -0.02537900 |
| C  | 4.94596000  | -0.58400700 | -1.48735100 |
| C  | 6.14687300  | 0.40225000  | -1.43094100 |
| H  | 7.58850200  | -0.94131300 | 0.34802700  |
| H  | 6.96939000  | -0.27011500 | 1.85952900  |
| H  | 6.78117200  | 1.69464000  | 0.27223700  |
| H  | 5.23765300  | -1.59180200 | -1.79944600 |
| H  | 4.15976900  | -0.24421800 | -2.16419000 |
| H  | 7.07849100  | -0.05601300 | -1.77352800 |
| H  | 5.96597800  | 1.27953100  | -2.05552800 |

|   |            |             |             |
|---|------------|-------------|-------------|
| C | 3.07936100 | -1.27726400 | 0.21582000  |
| H | 3.05341400 | -2.24493500 | -0.29348500 |
| H | 2.90762500 | -1.45872900 | 1.28053500  |
| S | 1.64353200 | -0.38577200 | -0.34724400 |
| O | 1.27603500 | 0.64352200  | 0.63185700  |
| O | 1.82441200 | 0.03891400  | -1.72995700 |
| O | 0.56062500 | -1.52925300 | -0.26792800 |
| O | 5.38218500 | -2.47920400 | 1.19056100  |
| C | 5.49705400 | -1.36728300 | 0.73927200  |
| C | 4.71230100 | 0.86335000  | 0.45832700  |
| C | 4.45543600 | 1.05017600  | 1.95607900  |
| H | 4.85925300 | 2.01084800  | 2.29216600  |
| H | 3.37714200 | 1.05501500  | 2.14409600  |
| H | 4.89913700 | 0.26395400  | 2.57481400  |
| C | 4.00425000 | 1.99274700  | -0.30133100 |
| H | 4.57558000 | 2.91851800  | -0.16585100 |
| H | 3.91045600 | 1.80276600  | -1.37166900 |
| H | 2.99880300 | 2.15554200  | 0.08924800  |

**IM-BIII**

|    |             |             |             |
|----|-------------|-------------|-------------|
| C  | -3.39553900 | -2.05608600 | -1.63432800 |
| C  | -2.04724600 | -2.24016500 | -1.32962600 |
| C  | -1.63734500 | -3.39592600 | -0.66001600 |
| C  | -2.57589900 | -4.35432100 | -0.28637800 |
| C  | -3.92540300 | -4.16267200 | -0.57829700 |
| C  | -4.33111500 | -3.01557800 | -1.25607400 |
| H  | -3.71513900 | -1.14565300 | -2.13104000 |
| H  | -0.58357000 | -3.52524500 | -0.41804400 |
| H  | -2.25465300 | -5.24547600 | 0.24352000  |
| H  | -4.65864500 | -4.90188800 | -0.27243900 |
| H  | -5.38196400 | -2.85606400 | -1.47428100 |
| C  | -1.00098000 | -1.21146900 | -1.67971300 |
| H  | -0.27818500 | -1.18067900 | -0.86768400 |
| O  | -1.67950900 | 0.07344100  | -1.73675200 |
| C  | -1.14406500 | 1.13620800  | -1.19293000 |
| C  | -2.11793100 | 2.32983700  | -1.35139400 |
| N  | 0.02271000  | 1.21608200  | -0.69592500 |
| H  | 0.22429000  | 2.12027100  | -0.27667500 |
| Cl | -1.99523400 | 2.84249900  | -3.05924100 |
| Cl | -3.77129600 | 1.83389400  | -0.98345400 |
| Cl | -1.65485300 | 3.68199500  | -0.29881500 |
| H  | 1.15851400  | 0.25276600  | -0.73550400 |
| C  | -2.02589000 | 1.04425200  | 2.24264500  |
| C  | -2.02625800 | -0.28491200 | 1.77886200  |
| C  | -3.27607900 | -0.88416200 | 1.53900300  |
| C  | -4.44069100 | -0.17602500 | 1.77869500  |
| C  | -4.43544700 | 1.12778800  | 2.26581800  |
| C  | -3.20531100 | 1.73217900  | 2.49351200  |
| H  | -3.32035700 | -1.90634900 | 1.17469100  |
| H  | -5.36368100 | 1.65392100  | 2.44954800  |
| H  | -3.15100600 | 2.74813000  | 2.86938400  |
| N  | -0.85869900 | -0.95694300 | 1.52718600  |
| H  | -0.00396500 | -0.62162300 | 1.95739200  |
| H  | -0.91204300 | -1.96187600 | 1.43757700  |
| C  | -0.30838000 | -1.44598300 | -3.00946400 |
| H  | 0.20269100  | -2.41114900 | -2.97543400 |
| H  | -1.03752800 | -1.45638000 | -3.82335500 |
| H  | 0.43839200  | -0.66852200 | -3.19172400 |
| Cl | -0.49220200 | 1.81249200  | 2.58677900  |
| Cl | -5.97165500 | -0.94840500 | 1.44391700  |
| C  | 6.29754800  | 1.27222500  | -0.06281800 |
| C  | 7.29109200  | 0.14743300  | 0.24754100  |
| C  | 4.95439900  | -0.56169400 | -0.08151300 |

|   |            |             |             |
|---|------------|-------------|-------------|
| C | 5.05429600 | -0.15020400 | -1.57921000 |
| C | 5.92421300 | 1.13755500  | -1.55249000 |
| H | 8.08943600 | 0.03684500  | -0.49187600 |
| H | 7.75969300 | 0.23293900  | 1.23187500  |
| H | 6.63728300 | 2.26869900  | 0.23128000  |
| H | 5.50336400 | -0.95357000 | -2.17206200 |
| H | 4.05491700 | 0.03244700  | -1.97760200 |
| H | 6.81377400 | 1.05217800  | -2.18210900 |
| H | 5.36047100 | 2.00463700  | -1.90312000 |
| C | 3.97696900 | -1.68180600 | 0.23932500  |
| H | 4.02344400 | -2.45581100 | -0.53194300 |
| H | 4.22652100 | -2.16361300 | 1.19047200  |
| S | 2.25084400 | -1.28116700 | 0.41505700  |
| O | 2.05506900 | -0.48768700 | 1.63062700  |
| O | 2.00227800 | -0.38597200 | -0.85139200 |
| O | 1.48370900 | -2.51898600 | 0.30774500  |
| O | 6.67722200 | -2.21978100 | 0.43438500  |
| C | 6.37181600 | -1.07125300 | 0.23392300  |
| C | 4.98942000 | 0.81799800  | 0.65792800  |
| C | 5.12726200 | 0.67797900  | 2.17682800  |
| H | 5.37229500 | 1.64788300  | 2.62249200  |
| H | 4.17866200 | 0.33966000  | 2.60260100  |
| H | 5.90193900 | -0.03395300 | 2.47738200  |
| C | 3.84242800 | 1.79403100  | 0.36312300  |
| H | 4.17639000 | 2.80785100  | 0.61287700  |
| H | 3.53145300 | 1.78801600  | -0.68347700 |
| H | 2.96939500 | 1.56472100  | 0.97677100  |

**TS-BIII (S<sub>N</sub>2)**Value of imaginary frequency = -292.8 cm<sup>-1</sup>

|    |             |             |             |
|----|-------------|-------------|-------------|
| C  | -2.37450700 | 1.11150000  | 1.27765300  |
| C  | -2.50416700 | 0.78014200  | -0.07924000 |
| C  | -3.77214300 | 0.79883300  | -0.68123900 |
| C  | -4.88942500 | 1.14058000  | 0.06679600  |
| C  | -4.74661200 | 1.47704100  | 1.41333400  |
| C  | -3.49077700 | 1.46662900  | 2.01986100  |
| H  | -1.39124000 | 1.06912900  | 1.74045900  |
| H  | -3.88125300 | 0.53611500  | -1.72855600 |
| H  | -5.87105400 | 1.14060100  | -0.39431100 |
| H  | -5.62271700 | 1.74423600  | 1.99600500  |
| H  | -3.38799900 | 1.71560400  | 3.07043000  |
| C  | -1.32483200 | 0.38120300  | -0.81155700 |
| H  | -0.41562900 | 0.21965900  | -0.23863300 |
| O  | -0.66160500 | 2.35147000  | -1.19940600 |
| C  | 0.35222400  | 2.78425700  | -0.64170300 |
| C  | 0.26554800  | 4.27160700  | -0.16819800 |
| N  | 1.46139900  | 2.11477600  | -0.41417800 |
| H  | 2.23024300  | 2.54460500  | 0.07763600  |
| Cl | 0.03844100  | 5.27364900  | -1.61533000 |
| Cl | -1.14181800 | 4.41043900  | 0.90261500  |
| Cl | 1.71957700  | 4.82479400  | 0.70437500  |
| H  | 1.60504800  | 1.15592400  | -0.82268400 |
| C  | -3.45269700 | -2.10001300 | 1.48327800  |
| C  | -2.84159300 | -2.25722200 | 0.22456100  |
| C  | -3.67609000 | -2.55164200 | -0.86696000 |
| C  | -5.05001600 | -2.62808600 | -0.69563100 |
| C  | -5.64895200 | -2.43822100 | 0.54378400  |
| C  | -4.82684000 | -2.18571200 | 1.63805600  |
| H  | -3.23860000 | -2.72741100 | -1.84440000 |
| H  | -6.72419800 | -2.50538200 | 0.65359300  |
| H  | -5.25335100 | -2.05643200 | 2.62673700  |
| N  | -1.50567900 | -2.01634200 | 0.03169200  |
| H  | -0.89076100 | -1.98100500 | 0.83927200  |
| H  | -1.01912600 | -2.42935400 | -0.76432200 |
| C  | -1.35718600 | -0.01176200 | -2.24489200 |
| H  | -2.02762100 | -0.86847500 | -2.36714000 |
| H  | -1.76406300 | 0.81439800  | -2.83250800 |
| H  | -0.36111400 | -0.27770500 | -2.59601600 |
| Cl | -2.44828100 | -1.83222500 | 2.88695200  |
| Cl | -6.05062900 | -2.95780900 | -2.08600500 |
| C  | 6.11303100  | -0.72816000 | 0.81938300  |
| C  | 6.63610500  | -2.16786700 | 0.76972100  |

|   |            |             |             |
|---|------------|-------------|-------------|
| C | 4.44679100 | -1.79926900 | -0.30141500 |
| C | 5.13315100 | -0.92673800 | -1.39105900 |
| C | 6.23889300 | -0.16108300 | -0.61030900 |
| H | 7.58843100 | -2.28167800 | 0.24397100  |
| H | 6.74348000 | -2.62959700 | 1.75525200  |
| H | 6.56891000 | -0.10760000 | 1.59589100  |
| H | 5.53666500 | -1.55295600 | -2.19293200 |
| H | 4.39257900 | -0.25996800 | -1.83809100 |
| H | 7.23658600 | -0.33609900 | -1.02169400 |
| H | 6.06731000 | 0.91761000  | -0.63041500 |
| C | 3.16196800 | -2.49623600 | -0.70878800 |
| H | 3.29299000 | -2.95955800 | -1.69045900 |
| H | 2.91217100 | -3.29912700 | -0.00847200 |
| S | 1.65770300 | -1.53138300 | -0.83476000 |
| O | 1.19079900 | -1.25414800 | 0.54991900  |
| O | 1.99013900 | -0.25897000 | -1.55260100 |
| O | 0.72949900 | -2.38314000 | -1.60703200 |
| O | 5.45703000 | -4.02964100 | -0.30318000 |
| C | 5.51009300 | -2.86593900 | 0.00644000  |
| C | 4.57175100 | -0.90917600 | 0.97588900  |
| C | 4.13619000 | -1.64019200 | 2.24822700  |
| H | 4.41826800 | -1.06240000 | 3.13495000  |
| H | 3.04752200 | -1.75166600 | 2.24422300  |
| H | 4.57437200 | -2.63821700 | 2.34434100  |
| C | 3.85041200 | 0.44156600  | 0.93145200  |
| H | 4.28378000 | 1.09975800  | 1.69491100  |
| H | 3.94598300 | 0.93196700  | -0.04072600 |
| H | 2.78835400 | 0.30689600  | 1.14667400  |

**IM-BII2**

|    |             |             |             |
|----|-------------|-------------|-------------|
| C  | -1.44697600 | 1.52890600  | 1.30030600  |
| C  | -2.29156500 | 1.01247900  | 0.31170100  |
| C  | -3.64007700 | 1.36232600  | 0.30854100  |
| C  | -4.14389700 | 2.20851700  | 1.29412500  |
| C  | -3.30473700 | 2.70590400  | 2.28631000  |
| C  | -1.95226500 | 2.36917900  | 2.28559200  |
| H  | -0.39250400 | 1.25243700  | 1.29170800  |
| H  | -4.30279300 | 0.97942400  | -0.46141200 |
| H  | -5.19511800 | 2.47841700  | 1.28592900  |
| H  | -3.70042800 | 3.36503100  | 3.05224400  |
| H  | -1.28933900 | 2.76880200  | 3.04620300  |
| C  | -1.70555900 | 0.03205300  | -0.67273400 |
| H  | -0.66199900 | 0.30271700  | -0.84770300 |
| O  | -0.64505800 | 2.44796900  | -2.01233900 |
| C  | 0.15476900  | 2.88382400  | -1.21169500 |
| C  | -0.09583400 | 4.31209600  | -0.60976600 |
| N  | 1.28520100  | 2.28358700  | -0.82533300 |
| H  | 1.89445900  | 2.68806200  | -0.13315500 |
| Cl | 0.70583200  | 5.46917000  | -1.70704700 |
| Cl | -1.82865500 | 4.62984000  | -0.54866300 |
| Cl | 0.59910700  | 4.49936400  | 1.03118800  |
| H  | 1.52800000  | 1.37379200  | -1.23007400 |
| C  | -3.53485000 | -2.10735800 | 1.34501300  |
| C  | -2.78675400 | -2.11839500 | 0.16620800  |
| C  | -3.17772200 | -2.92538000 | -0.89956000 |
| C  | -4.33603100 | -3.68207400 | -0.79558200 |
| C  | -5.10257700 | -3.65857900 | 0.36574900  |
| C  | -4.69135600 | -2.87708900 | 1.43660900  |
| H  | -2.56977400 | -2.96198600 | -1.79758200 |
| H  | -6.00334800 | -4.25737200 | 0.43223900  |
| H  | -5.26224800 | -2.86222600 | 2.35770800  |
| N  | -1.58126600 | -1.34028000 | 0.01068400  |
| H  | -1.11357400 | -1.17566500 | 0.91131600  |
| H  | -0.80734300 | -1.87533400 | -0.57082500 |
| C  | -2.39687500 | -0.09053900 | -2.01468800 |
| H  | -3.42930200 | -0.43880300 | -1.93416000 |
| H  | -2.38313100 | 0.89810900  | -2.47514800 |
| H  | -1.83647800 | -0.77286300 | -2.66033500 |
| Cl | -3.01501300 | -1.19706200 | 2.72639800  |
| Cl | -4.82582600 | -4.67646900 | -2.13058700 |
| C  | 6.00947200  | -0.82575200 | 0.80219000  |
| C  | 6.35478200  | -2.29658600 | 1.06218600  |
| C  | 4.22117500  | -1.90072000 | -0.10214000 |



|   |            |             |             |
|---|------------|-------------|-------------|
| C | 4.99886500 | -1.36244800 | -1.33657100 |
| C | 6.19304300 | -0.58655700 | -0.71090400 |
| H | 7.28154400 | -2.63091100 | 0.58702800  |
| H | 6.41404200 | -2.55305500 | 2.12381800  |
| H | 6.54169700 | -0.11658400 | 1.44191900  |
| H | 5.31936100 | -2.18580800 | -1.98269400 |
| H | 4.34281000 | -0.71831000 | -1.92556600 |
| H | 7.16009900 | -0.95882400 | -1.05933900 |
| H | 6.14792700 | 0.47661400  | -0.95694600 |
| C | 2.85845200 | -2.51248700 | -0.37633100 |
| H | 2.91416300 | -3.16950600 | -1.24886800 |
| H | 2.52171400 | -3.12194500 | 0.46724700  |
| S | 1.51502800 | -1.38335900 | -0.70199800 |
| O | 1.07561000 | -0.80703200 | 0.59511500  |
| O | 1.98432400 | -0.37427000 | -1.67107200 |
| O | 0.42417300 | -2.26138500 | -1.26540300 |
| O | 4.94250800 | -4.18538400 | 0.39147100  |
| C | 5.14640000 | -2.99831000 | 0.44408400  |
| C | 4.45890200 | -0.78198300 | 0.96444800  |
| C | 3.95310100 | -1.17497700 | 2.35508300  |
| H | 4.31654100 | -0.46448800 | 3.10523000  |
| H | 2.85928600 | -1.14801300 | 2.36197400  |
| H | 4.26588900 | -2.17745100 | 2.66303800  |
| C | 3.90875600 | 0.61092300  | 0.63193800  |
| H | 4.44395400 | 1.35275200  | 1.23713100  |
| H | 4.02271500 | 0.87858100  | -0.42055000 |
| H | 2.84632900 | 0.66164600  | 0.87934400  |

**IM-BII3**

|    |             |             |             |
|----|-------------|-------------|-------------|
| C  | -2.10520400 | 3.16760600  | -0.41397000 |
| C  | -2.54210700 | 1.92751800  | -0.88374300 |
| C  | -3.90353600 | 1.74194400  | -1.13966700 |
| C  | -4.80901500 | 2.77491000  | -0.91695100 |
| C  | -4.36362300 | 4.00702000  | -0.44491600 |
| C  | -3.00785300 | 4.20381500  | -0.19715400 |
| H  | -1.04671800 | 3.31410600  | -0.21103200 |
| H  | -4.26390100 | 0.78297000  | -1.50274300 |
| H  | -5.86457300 | 2.61723300  | -1.11425000 |
| H  | -5.07171200 | 4.81161300  | -0.27458500 |
| H  | -2.65284400 | 5.16302700  | 0.16562900  |
| C  | -1.54011000 | 0.80362200  | -1.04043700 |
| H  | -0.53611000 | 1.23865600  | -1.01591700 |
| C  | -3.66314800 | -0.30199000 | 1.44577100  |
| C  | -2.78247300 | -0.76255800 | 0.45920500  |
| C  | -3.11518300 | -1.92172300 | -0.24518300 |
| C  | -4.31879100 | -2.56672400 | 0.00379400  |
| C  | -5.19917000 | -2.09884500 | 0.97315400  |
| C  | -4.85682600 | -0.96741700 | 1.70226200  |
| H  | -2.41848800 | -2.31936500 | -0.97510600 |
| H  | -6.13171200 | -2.61771300 | 1.16042700  |
| H  | -5.51975100 | -0.58807300 | 2.47132500  |
| N  | -1.54857900 | -0.11287100 | 0.16211500  |
| H  | -1.24593000 | 0.44688500  | 0.96111500  |
| H  | -0.35767800 | -1.05214900 | -0.05056700 |
| C  | -1.67504900 | 0.01756200  | -2.33719100 |
| H  | -2.65607600 | -0.45235300 | -2.44180900 |
| H  | -1.54194900 | 0.70424900  | -3.17584700 |
| H  | -0.89761000 | -0.74922600 | -2.39806200 |
| Cl | -3.27070700 | 1.10825800  | 2.38385900  |
| Cl | -4.72015800 | -3.99713300 | -0.90091200 |
| C  | 6.21886700  | 0.78089400  | 0.06291100  |
| C  | 6.72279500  | -0.45874800 | 0.81081800  |
| C  | 4.41333700  | -0.59219800 | -0.02537900 |
| C  | 4.94596000  | -0.58400700 | -1.48735100 |
| C  | 6.14687300  | 0.40225000  | -1.43094100 |
| H  | 7.58850200  | -0.94131300 | 0.34802700  |
| H  | 6.96939000  | -0.27011500 | 1.85952900  |
| H  | 6.78117200  | 1.69464000  | 0.27223700  |
| H  | 5.23765300  | -1.59180200 | -1.79944600 |
| H  | 4.15976900  | -0.24421800 | -2.16419000 |
| H  | 7.07849100  | -0.05601300 | -1.77352800 |
| H  | 5.96597800  | 1.27953100  | -2.05552800 |

|   |            |             |             |
|---|------------|-------------|-------------|
| C | 3.07936100 | -1.27726400 | 0.21582000  |
| H | 3.05341400 | -2.24493500 | -0.29348500 |
| H | 2.90762500 | -1.45872900 | 1.28053500  |
| S | 1.64353200 | -0.38577200 | -0.34724400 |
| O | 1.27603500 | 0.64352200  | 0.63185700  |
| O | 1.82441200 | 0.03891400  | -1.72995700 |
| O | 0.56062500 | -1.52925300 | -0.26792800 |
| O | 5.38218500 | -2.47920400 | 1.19056100  |
| C | 5.49705400 | -1.36728300 | 0.73927200  |
| C | 4.71230100 | 0.86335000  | 0.45832700  |
| C | 4.45543600 | 1.05017600  | 1.95607900  |
| H | 4.85925300 | 2.01084800  | 2.29216600  |
| H | 3.37714200 | 1.05501500  | 2.14409600  |
| H | 4.89913700 | 0.26395400  | 2.57481400  |
| C | 4.00425000 | 1.99274700  | -0.30133100 |
| H | 4.57558000 | 2.91851800  | -0.16585100 |
| H | 3.91045600 | 1.80276600  | -1.37166900 |
| H | 2.99880300 | 2.15554200  | 0.08924800  |
